# Supplementary material for: Longitudinal NMR-Based Metabolomics Study Reveals How Hospitalized COVID-19 Patients Recover: Evidence of Dyslipidemia and Energy Metabolism Dysregulation
Source: Preprints.org preprint supplement (doi:10.20944/preprints202312.2130.v1), 2023-12-28
Supplement: Supplementary file 1 [file supplementary]

## Sheet: A_INPUT_FEATURES
Sample ID	Label	Glucose	Creatinine	TG	Chol	LDL-Chol	HDL-Chol	LDL-Phos	HDL-Phos	Apo-A1	Apo-B100	Apo-B100/Apo-A1	GlycA	GlycB	Glyc	SPC	Glyc/SPC	Ethanol	Trimethylamine-N-oxide	2-Aminobutyric acid	Alanine	Asparagine	Creatine	Glutamic acid	Glutamine	Glycine	Histidine	Isoleucine	Leucine	Lysine	Methionine	N,N-Dimethylglycine	Ornithine	Phenylalanine	Proline	Sarcosine	Threonine	Tyrosine	Valine	2-Hydroxybutyric acid	Acetic acid	Citric acid	Formic acid	Lactic acid	Succinic acid	Choline	2-Oxoglutaric acid	3-Hydroxybutyric acid	Acetoacetic acid
CO0280_1	COVID19-A	2.856	0.049	122	193	109	48	62	67	126	85	0.67	1.02	0.43	1.45	1.84	0.79	0	0	0.08	0.31	0	0	0.2	0.62	0.25	0.08	0.05	0.07	0.2	0.07	0	0.07	0.03	0.17	0	0.15	0.05	0.21	0	0.07	0.13	0.03	4.4	0	0	0	0.08	0
CO0280_3	COVID19-B	1.983	0.052	82	177	103	56	58	75	146	70	0.48	0.8	0.33	1.13	2.06	0.55	0	0	0.05	0.31	0	0	0.17	0.66	0.24	0.13	0.04	0.09	0.17	0.09	0	0.13	0.03	0.23	0	0	0.06	0.21	0	0.02	0.1	0.03	5.4	0	0	0	0.04	0
CO0280_4	COVID19-C	3.317	0.043	122	190	105	55	61	81	150	78	0.52	0.83	0.35	1.17	2.2	0.53	0	0	0	0.26	0	0	0.12	0.74	0.26	0.09	0.04	0.07	0.15	0.06	0	0.04	0	0.22	0.01	0.14	0.04	0.17	0	0	0.1	0.04	3.2	0	0	0	0.06	0
CO0375_1	COVID19-A	5.242	0.068	94	143	89	35	54	54	98	76	0.78	1.46	0.62	2.09	1.29	1.62	0.27	0	0	0.28	0	0	0.22	0.45	0.22	0.05	0.03	0.08	0.15	0	0	0	0.07	0	0	0.05	0.06	0.25	0	0.02	0.15	0.04	1.9	0	0	0.07	0.06	0
CO0375_3	COVID19-B	4.909	0.085	176	228	132	42	76	62	122	116	0.95	0.93	0.38	1.31	1.94	0.68	0	0	0	0.49	0	0.01	0.12	0.82	0.3	0.09	0.06	0.08	0.21	0.07	0	0.03	0.05	0.19	0	0	0.06	0.23	0	0.01	0.18	0.04	3.1	0	0	0	0	0
CO0375_4	COVID19-C	5.335	0.083	187	258	159	45	87	65	139	123	0.89	0.87	0.35	1.22	2.25	0.54	0	0	0	0.46	0	0.03	0.21	0.59	0.25	0.1	0.06	0.08	0.16	0.08	0	0	0.04	0	0	0	0.06	0.22	0	0.11	0.14	0.04	2.7	0	0	0	0	0
CO0392_1	COVID19-A	11.95	0.052	147	140	82	36	55	56	94	91	0.97	1.23	0.51	1.74	1.29	1.36	0	0	0	0.3	0	0.08	0.07	0.54	0.28	0.04	0.07	0.11	0.17	0	0	0	0.05	0.23	0	0.15	0.07	0.27	0.18	0.02	0.21	0.05	3.1	0.07	0	0.03	1.7	0.07
CO0392_3	COVID19-B	10.413	0.027	80	149	90	43	53	59	121	71	0.59	0.86	0.36	1.22	1.61	0.76	0	0	0.09	0.39	0	0.05	0.15	0.68	0.3	0.07	0.06	0.15	0.19	0	0	0.03	0.03	0	0.01	0.14	0.04	0.32	0	0.03	0.23	0.05	3.4	0.02	0	0	0.66	0.03
CO0392_4	COVID19-C	4.285	0.047	82	131	71	39	42	55	114	60	0.52	0.78	0.33	1.11	1.52	0.73	0	0	0.11	0.51	0	0.06	0.29	0.56	0.25	0.09	0.08	0.14	0.24	0.07	0	0	0.04	0.12	0	0	0.04	0.38	0	0.14	0.16	0.04	9.3	0	0.06	0	0.34	0
CO0396_1	COVID19-A	6.289	0.042	101	156	85	42	58	66	96	86	0.9	1.63	0.65	2.28	1.58	1.44	0.56	0	0	0.34	0	0.04	0.22	0.41	0.28	0.05	0.05	0.08	0	0	0	0	0.05	0	0	0.06	0.05	0.22	0.18	0.01	0.13	0.04	2.9	0	0	0.04	0.23	0
CO0396_3	COVID19-B	4.149	0.044	106	182	93	60	54	85	154	73	0.47	0.93	0.39	1.32	2.24	0.59	0	0	0	0.61	0	0.04	0.32	0.67	0.27	0.08	0.03	0.09	0.2	0	0	0.11	0.04	0	0	0.16	0.05	0.23	0	0	0.24	0.04	7.3	0	0	0.07	0.09	0
CO0396_4	COVID19-C	3.82	0.044	111	206	118	60	65	81	152	83	0.55	0.96	0.4	1.36	2.3	0.59	0	0	0.1	0.53	0	0.06	0.42	0.52	0.21	0.08	0.05	0.09	0.21	0.06	0	0.1	0.04	0.18	0	0.1	0.05	0.21	0	0.1	0.17	0.04	6.3	0	0	0	0.03	0
CO0397_1	COVID19-A	6.251	0.06	255	238	148	32	82	45	94	143	1.52	1.28	0.5	1.78	1.29	1.38	0.63	0	0	0.48	0	0.02	0.2	0.52	0.32	0.06	0.08	0.11	0.18	0.05	0	0.05	0.04	0.2	0.02	0.3	0.06	0.29	0	0	0.18	0.04	3.7	0	0	0.03	0.12	0
CO0397_3	COVID19-B	3.339	0.065	205	226	147	31	77	35	101	119	1.19	0.97	0.4	1.37	1.2	1.14	0.29	0	0	0.5	0	0.03	0.31	0.44	0.23	0.11	0.07	0.1	0.22	0.07	0	0	0.03	0.17	0.01	0	0.06	0.26	0	0.07	0.11	0.03	6.8	0	0	0	0.03	0
CO0397_4	COVID19-C	4.722	0.073	157	176	115	33	61	37	99	93	0.94	0.99	0.38	1.37	1.15	1.19	0	0	0	0.48	0	0.03	0.3	0.47	0.26	0.07	0.06	0.09	0.25	0.07	0	0.13	0.04	0.08	0.02	0	0.05	0.27	0	0.1	0.17	0.04	3.2	0	0	0	0.06	0
CO0407_1	COVID19-A	4.608	0.057	90	158	81	60	53	84	126	69	0.54	1.05	0.43	1.47	2.04	0.72	1.4	0	0	0.3	0	0.06	0	0.58	0.18	0.06	0.05	0.08	0.19	0	0	0.04	0.05	0.17	0	0.11	0.05	0.24	0.23	0.03	0.14	0.02	2.7	0	0	0	0.31	0.01
CO0407_3	COVID19-B	3.603	0.069	99	213	102	84	63	126	194	77	0.4	0.84	0.34	1.18	3.59	0.33	0	0	0.07	0.4	0	0.05	0	0.72	0.22	0.07	0.05	0.07	0.2	0	0	0.04	0.04	0	0.01	0.23	0.04	0.2	0	0	0.17	0.03	3.4	0	0	0	0.09	0
CO0407_4	COVID19-C	3.395	0.059	86	218	129	63	73	84	155	97	0.62	0.75	0.29	1.03	2.98	0.35	0	0	0.11	0.35	0	0.06	0.22	0.52	0.22	0.13	0.05	0.07	0.25	0.07	0	0	0.03	0.06	0	0	0.05	0.22	0	0.08	0.09	0.05	3.7	0	0	0	0.04	0
CO0408_1	COVID19-A	3.197	0.073	309	217	116	43	65	63	116	116	1	1.31	0.49	1.8	1.87	0.96	0	0	0	0.63	0	0.04	0.17	0.58	0.26	0.07	0.09	0.1	0.27	0	0	0.06	0.06	0	0.03	0.39	0.06	0.27	0	0	0.12	0.02	8.7	0	0	0.04	0	0
CO0408_3	COVID19-B	2.47	0.116	98	179	101	49	55	64	133	74	0.55	0.82	0.32	1.14	1.82	0.63	0	0	0.1	0.32	0	0.02	0.35	0.47	0.27	0.08	0.05	0.09	0.22	0.06	0	0	0.04	0	0	0	0.05	0.23	0	0.14	0.17	0.03	6.8	0	0	0	0.23	0
CO0408_4	COVID19-C	4.258	0.086	78	162	84	61	48	77	151	59	0.39	0.74	0.29	1.04	2.07	0.5	0	0	0.06	0.41	0.06	0.01	0.24	0.6	0.23	0.14	0.06	0.1	0.19	0.09	0	0.09	0	0.21	0	0	0.04	0.25	0	0.15	0.1	0.03	2.9	0	0	0	0.03	0
CO0410_1	COVID19-A	4.891	0.04	183	212	133	48	73	64	118	96	0.81	1.11	0.46	1.57	1.76	0.89	0.26	0	0	0.59	0	0	0.05	0.7	0.45	0.09	0.05	0.08	0.22	0.05	0	0.03	0.05	0	0	0.3	0.06	0.22	0	0.02	0.15	0.04	3.7	0	0	0	0.04	0
CO0410_3	COVID19-B	3.877	0.045	138	248	148	52	84	79	141	114	0.81	0.85	0.35	1.21	2.24	0.54	0	0	0	0.46	0	0.02	0	0.74	0.41	0.08	0.05	0.08	0.2	0.05	0	0.02	0.04	0	0.01	0.17	0.05	0.2	0	0	0.18	0.04	3.5	0	0	0	0.03	0
CO0410_4	COVID19-C	4.445	0.062	139	298	184	57	97	75	154	135	0.88	0.84	0.36	1.19	2.39	0.5	0	0	0.09	0.39	0	0	0.16	0.62	0.41	0.1	0.06	0.08	0.15	0.09	0	0	0.04	0	0	0	0.06	0.19	0	0.09	0.11	0.03	2.5	0	0	0	0	0
CO0672_1	COVID19-A	3.525	0.055	132	242	140	71	82	98	158	111	0.7	1.11	0.45	1.56	2.66	0.59	0	0	0.08	0.72	0	0.01	0.14	0.81	0.38	0.08	0.05	0.1	0.21	0.06	0	0.07	0.06	0	0.01	0.27	0.07	0.27	0	0	0.16	0.03	5.4	0	0	0.02	0.03	0
CO0672_3	COVID19-B	4.184	0.059	109	284	172	75	96	98	172	123	0.72	0.82	0.34	1.17	3.07	0.38	0	0	0.05	0.44	0	0.01	0.27	0.51	0.3	0.06	0.04	0.05	0.11	0.08	0	0.14	0	0.19	0	0	0.04	0.17	0	0.16	0.15	0.05	4.6	0	0	0	0.32	0
CO0672_4	COVID19-C	4.252	0.061	112	273	163	72	90	94	167	119	0.72	0.81	0.33	1.14	2.97	0.38	0	0	0.07	0.47	0	0.01	0.31	0.59	0.34	0.14	0.05	0.08	0.16	0.09	0	0	0.04	0.21	0	0	0.05	0.22	0	0.12	0.13	0.03	3.6	0	0	0	0.06	0
CO0673_1	COVID19-A	3.913	0.078	170	205	140	42	74	50	100	111	1.11	1.27	0.52	1.79	1.37	1.3	0	0	0.05	0.47	0	0.02	0.2	0.69	0.28	0.07	0.09	0.14	0.23	0	0	0.04	0.07	0.22	0.02	0.32	0.08	0.31	0	0	0.17	0.03	5.7	0	0	0.02	0.05	0
CO0673_3	COVID19-B	2.777	0.07	106	217	147	46	76	51	125	98	0.78	0.87	0.37	1.24	1.58	0.79	2.8	0	0	0.37	0	0.02	0.29	0.54	0.25	0.09	0.08	0.13	0.17	0.06	0	0.08	0	0	0.01	0	0.04	0.26	0	0.12	0.21	0.04	8	0	0	0	0.12	0
CO0673_4	COVID19-C	4.223	0.073	81	207	136	56	72	68	141	87	0.62	0.84	0.33	1.17	2.03	0.57	0	0	0	0.37	0	0.02	0.17	0.56	0.23	0.08	0.09	0.13	0.17	0.06	0	0.06	0.04	0	0	0.07	0.05	0.3	0	0.09	0.15	0.03	5.8	0	0	0	0.03	0
CO0675_1	COVID19-A	6.241	0.066	253	174	80	35	51	64	110	91	0.82	1.68	0.69	2.37	1.8	1.32	0.31	0	0.07	0.54	0	0.03	0.43	0.58	0.32	0.06	0.06	0.14	0	0	0	0.03	0.05	0	0.01	0.33	0.06	0.39	0	0	0.19	0.04	4.3	0	0	0.05	0.1	0
CO0675_3	COVID19-B	3.961	0.06	178	209	109	43	63	68	134	101	0.75	0.91	0.38	1.29	1.9	0.68	0	0	0	0.41	0	0.02	0.08	0.73	0.26	0.11	0.06	0.08	0.19	0.06	0	0	0.04	0.24	0.01	0.23	0.06	0.19	0	0.01	0.18	0.03	3.2	0	0	0	0.08	0.01
CO0675_4	COVID19-C	4.181	0.063	201	232	117	44	66	69	146	108	0.74	1.04	0.43	1.48	2.1	0.7	0	0	0.05	0.44	0	0.02	0.19	0.54	0.24	0.09	0.04	0.07	0.13	0.07	0	0.03	0.03	0	0.01	0	0.05	0.21	0	0.07	0.14	0.03	2.1	0	0	0	0.03	0
CO0677_1	COVID19-A	4.585	0.11	145	169	101	40	57	57	101	89	0.88	1.3	0.54	1.83	1.38	1.32	0	0	0	0.44	0	0.02	0.21	0.73	0.27	0.07	0.07	0.16	0.32	0.06	0	0.06	0.06	0	0.01	0.2	0.08	0.29	0	0	0.15	0.03	4.2	0	0	0	0.04	0
CO0677_3	COVID19-B	4.33	0.08	157	180	111	43	59	53	118	84	0.72	0.85	0.36	1.2	1.61	0.75	0	0	0	0.5	0	0.02	0.16	0.86	0.27	0.08	0.06	0.14	0.24	0.05	0	0.04	0.04	0	0.02	0.27	0.05	0.27	0	0.01	0.2	0.02	4.5	0	0	0	0	0
CO0677_4	COVID19-C	5.459	0.097	192	179	108	30	57	37	98	86	0.87	0.81	0.34	1.15	1.37	0.84	0	0	0	0.43	0	0.02	0.48	0.44	0.22	0.09	0.09	0.13	0.32	0.06	0	0.06	0.04	0	0.03	0.29	0.06	0.26	0	0.05	0.15	0.04	1.9	0	0	0	0.03	0
CO0678_1	COVID19-A	5.019	0.073	137	157	94	44	54	61	112	83	0.74	1.17	0.48	1.64	1.65	1	0	0	0	0.46	0.06	0.02	0.14	0.94	0.31	0.07	0.1	0.16	0.18	0.07	0	0.04	0.06	0	0.01	0.31	0.06	0.32	0	0	0.17	0.04	2.6	0	0	0	0.02	0
CO0678_3	COVID19-B	4.767	0.083	143	260	175	49	92	64	134	121	0.9	0.82	0.34	1.16	2.18	0.53	0	0	0	0.34	0	0.03	0.38	0.49	0.16	0.1	0.1	0.12	0.13	0.07	0	0	0.04	0.31	0	0	0.07	0.28	0	0.09	0.07	0.04	1.4	0	0	0	0	0
CO0678_4	COVID19-C	4.529	0.079	175	264	172	46	93	66	134	126	0.94	0.77	0.32	1.09	2.25	0.49	0	0	0	0.33	0	0.05	0.31	0.51	0.2	0.13	0.07	0.12	0.11	0.07	0	0	0.04	0	0.01	0	0.06	0.33	0	0.07	0.09	0.03	1.5	0	0	0	0	0
CO0680_1	COVID19-A	5.314	0.077	162	242	142	54	83	76	125	126	1	1.64	0.67	2.3	2.12	1.09	0	0	0.05	0.48	0	0.02	0.2	0.79	0.36	0.07	0.03	0.08	0	0.06	0	0.06	0.04	0	0	0.31	0.05	0.22	0	0	0.16	0.04	2.6	0	0	0.02	0.04	0
CO0680_3	COVID19-B	5.812	0.085	119	288	170	80	94	112	195	114	0.59	1.15	0.46	1.61	3.41	0.47	0	0	0.05	0.39	0	0.1	0.08	0.66	0.26	0.07	0.04	0.09	0	0.06	0	0.04	0.03	0.34	0.01	0.13	0.04	0.21	0	0.02	0.21	0.03	2.9	0	0	0	0.09	0.01
CO0680_4	COVID19-C	4.752	0.074	115	257	152	63	84	90	167	109	0.65	1.23	0.49	1.72	2.9	0.59	0	0	0	0.38	0	0.07	0.25	0.43	0.25	0.11	0.04	0.08	0	0.06	0	0.07	0	0.32	0	0	0.04	0.21	0	0.07	0.15	0.04	6.1	0	0	0	0.06	0
CO0682_1	COVID19-A	3.779	0.06	72	216	119	81	68	105	171	82	0.48	0.87	0.37	1.24	2.9	0.43	0	0	0.06	0.29	0	0.01	0.1	0.72	0.26	0.09	0.06	0.14	0.17	0.05	0	0.04	0.04	0	0	0.1	0.04	0.26	0	0.03	0.19	0.03	2.9	0.05	0	0	0.84	0.02
CO0682_3	COVID19-B	4.079	0.048	182	268	153	73	83	107	190	120	0.63	0.81	0.32	1.13	3.94	0.29	0	0	0	0.35	0	0.01	0.21	0.71	0.27	0.16	0.09	0.12	0.19	0.09	0	0	0	0.28	0	0	0.05	0.28	0	0.09	0.1	0.05	2.2	0.01	0	0	0.2	0
CO0682_4	COVID19-C	3.771	0.061	83	244	140	80	79	112	195	98	0.5	0.78	0.31	1.09	3.75	0.29	0	0	0	0.38	0	0.03	0.18	0.58	0.22	0.16	0.04	0.09	0.24	0.09	0	0	0.03	0.29	0	0	0.07	0.22	0	0.08	0.09	0.04	2.3	0	0	0	0	0
CO0683_1	COVID19-A	4.749	0.049	68	168	102	52	58	71	127	69	0.55	1	0.43	1.43	1.97	0.73	0.22	0	0	0.43	0.05	0.03	0.13	0.98	0.48	0.07	0.07	0.15	0.22	0.07	0	0.04	0.05	0	0	0.2	0.05	0.25	0	0.02	0.17	0.04	3	0	0	0	0.14	0
CO0683_3	COVID19-B	3.347	0.065	48	174	101	62	58	78	147	67	0.45	0.91	0.37	1.29	2.07	0.62	0	0	0.06	0.3	0	0.04	0.14	0.74	0.39	0.07	0.05	0.1	0.18	0	0	0.02	0.03	0	0	0.06	0.03	0.21	0	0	0.2	0.03	4.2	0.02	0	0	0.22	0.02
CO0683_4	COVID19-C	3.569	0.066	59	144	83	42	49	60	117	62	0.53	0.72	0.28	1.01	1.86	0.54	0	0	0.07	0.25	0	0.03	0.25	0.44	0.44	0.09	0.03	0.05	0.2	0.07	0	0.03	0	0.11	0	0	0.04	0.18	0	0.06	0.15	0.03	2.1	0	0	0	0.15	0
CO0688_1	COVID19-A	7.052	0.057	66	173	101	63	62	77	133	94	0.7	1.17	0.46	1.63	2.42	0.67	0	0	0	0.44	0	0	0	0.86	0.27	0.06	0.06	0.1	0.19	0	0	0.03	0.08	0	0	0.1	0.06	0.22	0	0.02	0.18	0.05	3.6	0	0	0	0.13	0.02
CO0688_3	COVID19-B	3.691	0.068	101	230	146	62	79	79	164	104	0.63	0.82	0.33	1.15	2.48	0.46	0	0	0	0.41	0	0.01	0.24	0.55	0.24	0.06	0.03	0.07	0.1	0.07	0	0.06	0	0.27	0	0	0.04	0.15	0	0.07	0.19	0.03	6.3	0	0	0	0.32	0
CO0688_4	COVID19-C	4.703	0.074	71	223	147	66	80	82	161	101	0.63	0.76	0.29	1.05	2.47	0.43	0	0	0.05	0.37	0	0	0.16	0.65	0.21	0.1	0.05	0.08	0.11	0.08	0	0.09	0	0.28	0	0	0.05	0.18	0	0.06	0.17	0	4.1	0	0	0	0.28	0
CO0707_1	COVID19-A	5.572	0.033	156	190	121	38	70	52	101	117	1.16	1.25	0.52	1.77	1.47	1.2	0	0	0	0.39	0.06	0.05	0.16	0.65	0.42	0.07	0.07	0.14	0	0	0	0.06	0.06	0	0	0.33	0.07	0.29	0	0.02	0.16	0.05	4.6	0	0	0	0.05	0
CO0707_3	COVID19-B	4.062	0.042	131	242	143	54	81	73	149	112	0.75	0.75	0.31	1.06	2.66	0.4	0	0	0.08	0.41	0	0.06	0.23	0.46	0.32	0.1	0.04	0.06	0.18	0.07	0	0.06	0.04	0	0	0	0.05	0.2	0	0.07	0.11	0.04	3.2	0	0	0	0.04	0
CO0707_4	COVID19-C	4.36	0.039	98	219	143	58	80	78	150	104	0.69	0.74	0.29	1.04	2.54	0.41	0	0	0.06	0.34	0	0.04	0.14	0.59	0.31	0.09	0.05	0.07	0.21	0.07	0	0	0	0	0	0	0.05	0.15	0	0.12	0.12	0.04	1.9	0	0	0	0.07	0
CO0708_1	COVID19-A	4.035	0.06	137	240	174	42	95	50	97	143	1.48	1.38	0.57	1.95	1.35	1.44	0	0	0.08	0.51	0	0.01	0.18	0.71	0.31	0.08	0.06	0.12	0	0.07	0	0.12	0.06	0	0	0.39	0.09	0.27	0	0	0.2	0.03	4.2	0	0	0	0.03	0
CO0708_3	COVID19-B	3.824	0.071	83	162	108	32	58	38	95	82	0.86	0.94	0.39	1.33	1.19	1.11	0	0	0.06	0.39	0	0.01	0.4	0.42	0.17	0.1	0.05	0.11	0.19	0.07	0	0.18	0.03	0.2	0	0	0.06	0.26	0	0.09	0.1	0.04	5.4	0	0	0	0.08	0
CO0708_4	COVID19-C	3.411	0.06	113	185	123	41	63	46	112	89	0.8	0.99	0.4	1.39	1.48	0.94	0	0	0	0.49	0.08	0.05	0.25	0.57	0.19	0.14	0.11	0.26	0.3	0.12	0	0.23	0.07	0.32	0	0	0.12	0.36	0	0.13	0.09	0.04	4.8	0	0	0	0	0
CO0710_1	COVID19-A	6.094	0.079	82	128	66	42	42	59	99	63	0.64	1.19	0.51	1.69	1.29	1.31	0	0	0	0.38	0	0	0.1	0.64	0.19	0.05	0.07	0.1	0.16	0	0	0.06	0.06	0.32	0	0.15	0.08	0.25	0	0.01	0.18	0.03	4.4	0	0	0.05	0	0
CO0710_3	COVID19-B	4.153	0.098	63	144	70	60	45	81	133	55	0.41	0.89	0.36	1.25	1.92	0.65	0	0	0	0.43	0.06	0	0.1	0.79	0.24	0.06	0.05	0.08	0.18	0.07	0	0.09	0.03	0	0	0.1	0.06	0.2	0	0.01	0.2	0.04	4.7	0	0	0	0	0
CO0710_4	COVID19-C	3.791	0.087	65	143	78	55	48	76	130	65	0.5	0.84	0.34	1.18	1.98	0.59	0	0	0	0.37	0	0.01	0.25	0.61	0.22	0.11	0.06	0.1	0.14	0.09	0	0.1	0.04	0.15	0	0	0.05	0.24	0	0.1	0.2	0.05	4.6	0	0	0	0.15	0
CO0711_1	COVID19-A	5.222	0.048	67	163	82	50	55	66	99	81	0.82	1.48	0.57	2.06	1.41	1.46	0	0	0.09	0.28	0	0	0.05	0.61	0.32	0.02	0.08	0.09	0.12	0	0	0.03	0.04	0	0	0.07	0.04	0.25	0	0.01	0.1	0.04	6.3	0.02	0	0	0.49	0.07
CO0711_3	COVID19-B	3.709	0.071	92	245	150	63	82	83	158	105	0.66	0.79	0.3	1.1	2.61	0.42	0.11	0	0.07	0.38	0	0.02	0.2	0.66	0.39	0.08	0.05	0.11	0.21	0.09	0	0	0	0	0	0	0.05	0.22	0	0.14	0.1	0.03	6.2	0	0	0	0.08	0
CO0711_4	COVID19-C	3.295	0.07	79	254	166	68	91	90	166	110	0.66	0.75	0.29	1.04	3	0.35	0	0	0.07	0.36	0	0.03	0.22	0.57	0.34	0.11	0.04	0.07	0.18	0.07	0	0.05	0	0	0	0	0.05	0.19	0	0.06	0.12	0.05	4.3	0	0	0	0.02	0
CO0713_1	COVID19-A	5.159	0.056	164	226	150	41	83	56	107	124	1.16	1.33	0.54	1.87	1.53	1.22	0	0	0	0.38	0	0	0.18	0.61	0.28	0.05	0.08	0.08	0.19	0	0	0.04	0.04	0	0.01	0.28	0.05	0.21	0	0.01	0.14	0.03	2.5	0	0	0.02	0.04	0
CO0713_3	COVID19-B	4.839	0.059	148	243	155	57	80	66	150	104	0.7	0.9	0.38	1.28	2.03	0.63	0	0	0	0.32	0	0.03	0.22	0.53	0.15	0.13	0.06	0.1	0.17	0.06	0	0	0.03	0	0.01	0	0.05	0.21	0	0.1	0.12	0.03	1.5	0	0	0	0	0
CO0713_4	COVID19-C	4.623	0.056	209	244	152	51	79	61	141	111	0.79	0.87	0.37	1.24	1.92	0.64	0	0	0	0.4	0	0.03	0.26	0.59	0.16	0.14	0.07	0.07	0.2	0.08	0	0	0.03	0.1	0.01	0	0.06	0.21	0	0.12	0.1	0.03	1.7	0	0	0	0	0
CO0752_1	COVID19-A	6.977	0.054	63	168	103	40	61	53	86	83	0.97	1.42	0.57	1.99	1.32	1.51	0	0	0	0.4	0	0.02	0.06	0.56	0.19	0.05	0.07	0.12	0.13	0	0	0.03	0.09	0	0	0.04	0.06	0.3	0	0.01	0.19	0.03	3.4	0	0	0	0.17	0.02
CO0752_3	COVID19-B	6.28	0.045	105	268	191	44	98	50	126	126	1	1.01	0.42	1.43	1.88	0.76	0	0	0	0.39	0	0.07	0.31	0.39	0.19	0.06	0.05	0.08	0	0	0	0	0.03	0.69	0	0	0.05	0.21	0	0.07	0.2	0	4.1	0	0	0	0.03	0
CO0752_4	COVID19-C	6.135	0.056	189	242	146	54	78	72	160	110	0.69	0.95	0.39	1.35	2.24	0.6	0	0	0.05	0.39	0	0.03	0	0.51	0.13	0.09	0.06	0.08	0.15	0.05	0	0	0.04	0.6	0	0	0.05	0.17	0	0.1	0.18	0.03	2.5	0	0	0	0.05	0
CO0753_1	COVID19-A	5.441	0.061	70	101	38	41	26	54	90	37	0.41	1.23	0.5	1.73	1.12	1.54	0	0	0	0.39	0.06	0.03	0.1	0.85	0.22	0.06	0.08	0.12	0	0.06	0	0.07	0.07	0	0	0.16	0.07	0.28	0	0.01	0.18	0.03	3	0	0	0	0.05	0.02
CO0753_3	COVID19-B	4.43	0.065	132	140	65	43	37	57	129	55	0.43	0.85	0.35	1.2	1.64	0.73	0	0	0	0.47	0	0.03	0.41	0.49	0.21	0.07	0.08	0.08	0.18	0	0	0	0	0	0	0	0.04	0.24	0	0.04	0.14	0.03	5	0	0	0	0	0
CO0753_4	COVID19-C	4.546	0.065	89	134	58	57	35	77	150	47	0.31	0.83	0.34	1.18	2.01	0.59	0	0	0.07	0.32	0	0.04	0.25	0.66	0.17	0.13	0.04	0.07	0.19	0.08	0	0	0	0	0.01	0	0.05	0.21	0	0.05	0.11	0.02	3.3	0	0	0	0.13	0
CO0754_1	COVID19-A	6.271	0.076	129	126	71	34	42	50	100	69	0.69	1.09	0.45	1.54	1.21	1.27	0	0	0	0.53	0.06	0.02	0.13	0.88	0.36	0.07	0.08	0.11	0.23	0	0	0.05	0.05	0	0	0.26	0.06	0.32	0	0.01	0.2	0.03	3.9	0	0	0	0.05	0
CO0754_3	COVID19-B	6.041	0.055	111	117	56	44	35	62	129	49	0.38	0.87	0.36	1.23	1.55	0.79	0	0	0	0.48	0	0.04	0.06	0.74	0.26	0.07	0.03	0.09	0.2	0	0	0	0	0	0.01	0	0.04	0.27	0	0.01	0.24	0	2.2	0	0	0	0	0
CO0754_4	COVID19-C	6.317	0.059	120	126	71	34	41	48	106	61	0.58	0.83	0.34	1.17	1.44	0.82	0	0	0	0.56	0	0.05	0.24	0.58	0.25	0.13	0.04	0.06	0.22	0.07	0	0	0.03	0.1	0	0	0.05	0.2	0	0.13	0.14	0.04	2.3	0	0	0	0	0
CO0757_1	COVID19-A	4.951	0.076	126	192	125	30	69	42	87	104	1.2	1.16	0.49	1.65	1.24	1.33	0	0	0	0.27	0	0.04	0.07	0.81	0.35	0.06	0.06	0.09	0.13	0.06	0	0.04	0.05	0	0.01	0.18	0.04	0.21	0	0.01	0.18	0.04	2.4	0	0	0	0.21	0.05
CO0757_3	COVID19-B	5.543	0.075	169	290	185	37	95	43	117	147	1.26	0.96	0.41	1.37	1.56	0.87	0	0	0	0.44	0	0.04	0.27	0.57	0.3	0.13	0.06	0.07	0.14	0.07	0	0	0	0.18	0	0	0.05	0.25	0	0.12	0.13	0.03	3.1	0	0	0	0	0
CO0757_4	COVID19-C	6.918	0.077	118	249	172	36	90	48	110	125	1.14	0.96	0.42	1.38	1.66	0.83	0	0	0	0.42	0	0.08	0.29	0.57	0.38	0.07	0.05	0.1	0.2	0.06	0	0.04	0.04	0.17	0	0	0.06	0.27	0	0.16	0.19	0.03	3	0	0	0	0.03	0
CO0840_1	COVID19-A	5.773	0.07	138	185	112	41	68	62	97	108	1.11	1.47	0.6	2.07	1.79	1.16	0	0	0.06	0.39	0	0.01	0.12	0.6	0.21	0.05	0.07	0.12	0.15	0	0	0.02	0.06	0	0	0.21	0.07	0.33	0.27	0.02	0.16	0.04	5.2	0	0	0	0.22	0.02
CO0840_3	COVID19-B	2.125	0.074	115	228	144	51	77	67	140	99	0.71	0.8	0.33	1.13	2.05	0.55	1.3	0	0	0.4	0	0	0.32	0.44	0.25	0.1	0.06	0.08	0.14	0.05	0	0	0.03	0	0	0	0.05	0.27	0	0.07	0.14	0.03	7.6	0.02	0	0	0	0
CO0840_4	COVID19-C	2.96	0.083	161	203	112	42	62	62	134	87	0.65	0.79	0.34	1.13	1.82	0.62	0	0	0	0.44	0	0.02	0.24	0.56	0.23	0.14	0.05	0.1	0.25	0.06	0	0.12	0.05	0	0.02	0.1	0.06	0.32	0	0.07	0.17	0.03	5.5	0	0	0.03	0.03	0
CO0841_1	COVID19-A	5.165	0.059	107	143	87	30	52	50	83	72	0.87	1.17	0.45	1.62	1.26	1.28	0	0	0	0.28	0	0.09	0.07	0.82	0.4	0.08	0.07	0.11	0.15	0.05	0	0	0.05	0	0.01	0.22	0.05	0.23	0	0.03	0.15	0.03	2.1	0	0	0.02	0.18	0.05
CO0841_3	COVID19-B	7.958	0.074	177	189	114	42	60	56	132	86	0.66	1.04	0.43	1.47	1.85	0.79	0	0	0.06	0.52	0	0.03	0.31	0.46	0.1	0.1	0.11	0.19	0.21	0.07	0	0	0.06	0.21	0	0	0.09	0.41	0	0.13	0.1	0.04	5.6	0.01	0	0	0.05	0
CO0841_4	COVID19-C	5.14	0.059	81	212	144	48	76	60	127	94	0.74	0.85	0.35	1.2	1.95	0.62	0	0	0	0.31	0	0.08	0.2	0.43	0.52	0.07	0.05	0.08	0.13	0.05	0	0	0	0	0	0.08	0.04	0.23	0	0.07	0.14	0.03	2.4	0	0	0	0.03	0
CO0846_1	COVID19-A	4.592	0.07	159	171	104	40	60	55	103	89	0.86	1.1	0.44	1.55	1.45	1.07	0	0	0	0.56	0.06	0.02	0.17	0.83	0.34	0.08	0.08	0.13	0.44	0.07	0.01	0.09	0.08	0	0.02	0.39	0.07	0.24	0	0	0.07	0.08	4.6	0	0	0.03	0.03	0
CO0846_3	COVID19-B	5.07	0.066	172	232	157	40	84	56	111	114	1.03	0.89	0.35	1.24	1.8	0.69	0	0	0	0.36	0	0.02	0.18	0.53	0.26	0.1	0.08	0.11	0.16	0.07	0	0	0	0.21	0	0	0.05	0.35	0	0.1	0.12	0	1.8	0	0	0	0.04	0
CO0846_4	COVID19-C	4.767	0.076	167	243	166	37	86	44	113	120	1.06	0.79	0.33	1.12	1.59	0.7	0	0	0	0.46	0	0.02	0.3	0.53	0.18	0.15	0.07	0.13	0.17	0.07	0	0	0.04	0	0	0	0.05	0.28	0	0.1	0.11	0.03	2.9	0	0	0	0.04	0
CO0848_1	COVID19-A	6.108	0.067	148	123	65	45	38	54	111	63	0.57	1.14	0.46	1.6	1.24	1.29	0	0	0.08	0.37	0	0.12	0.09	0.6	0.23	0.06	0.08	0.2	0.22	0	0	0.02	0.06	0	0	0.21	0.08	0.35	0.27	0.01	0.15	0.04	2.5	0.04	0	0.05	0.85	0.29
CO0848_3	COVID19-B	4.785	0.056	100	211	131	44	71	58	122	90	0.74	0.91	0.39	1.3	1.9	0.68	0	0	0	0.38	0	0.08	0.29	0.45	0.58	0.07	0.04	0.08	0.12	0	0	0	0.03	0	0	0.11	0.05	0.27	0	0.05	0.22	0.03	4.7	0	0	0	0	0
CO0848_4	COVID19-C	8.266	0.068	146	161	88	50	51	68	146	71	0.49	0.93	0.38	1.31	1.98	0.66	0	0	0.1	0.45	0	0.08	0.3	0.46	0.11	0.07	0.09	0.17	0.21	0.08	0	0.05	0.04	0.13	0	0	0.07	0.34	0	0.13	0.1	0.03	4.6	0	0	0	0.16	0
CO0850_1	COVID19-A	5.843	0.072	213	222	139	40	81	63	106	130	1.23	1.34	0.54	1.88	1.81	1.04	0	0	0	0.38	0	0.04	0.18	0.61	0.5	0.04	0.07	0.09	0.18	0	0	0.04	0.06	0	0.01	0.28	0.06	0.29	0	0.01	0.19	0.03	2.5	0	0	0.03	0.1	0.02
CO0850_3	COVID19-B	2.277	0.068	230	275	166	34	91	52	112	139	1.24	1.04	0.41	1.45	1.79	0.81	0	0	0	0.49	0	0.03	0.53	0.36	0.43	0.07	0.06	0.07	0.15	0	0	0.09	0.06	0	0.01	0	0.04	0.24	0	0.09	0.16	0.04	7.7	0.03	0	0	0.03	0
CO0850_4	COVID19-C	4.677	0.077	244	266	156	39	86	56	119	134	1.12	0.79	0.31	1.1	2.05	0.54	0	0	0	0.47	0	0.04	0.36	0.52	0.35	0.13	0.06	0.12	0.19	0.07	0	0.09	0.06	0.17	0.01	0	0.06	0.28	0	0.06	0.15	0.03	4.4	0.01	0	0	0.03	0
CO0853_1	COVID19-A	3.722	0.071	154	159	69	69	43	92	157	70	0.45	1.34	0.55	1.89	2.12	0.89	0.14	0	0.1	0.6	0	0.04	0.15	0.77	0.35	0.06	0.08	0.1	0.25	0	0	0.03	0.07	0.29	0.02	0.4	0.06	0.23	0	0	0.12	0.04	4.5	0	0	0	0.04	0
CO0853_3	COVID19-B	4.64	0.069	60	275	174	91	95	110	190	107	0.56	0.9	0.36	1.27	2.94	0.43	0	0	0	0.38	0	0.03	0	0.7	0.29	0.07	0.04	0.07	0.21	0	0	0.03	0	0	0	0.19	0.03	0.21	0	0.02	0.17	0	2.1	0	0	0	0	0
CO0853_4	COVID19-C	4.463	0.07	75	223	143	75	78	91	168	94	0.56	0.8	0.31	1.11	2.81	0.4	0	0	0.08	0.56	0	0.03	0.21	0.49	0.32	0.09	0.05	0.08	0.17	0.08	0	0.03	0.03	0.18	0	0	0.06	0.2	0	0.06	0.13	0.03	2.2	0	0	0	0	0
CO0854_1	COVID19-A	4.05	0.077	93	133	77	45	53	68	108	81	0.75	1.2	0.5	1.69	1.54	1.1	0	0	0	0.46	0	0	0.12	0.58	0.4	0.07	0.04	0.07	0.12	0	0	0.02	0.07	0	0	0.15	0.06	0.19	0	0.04	0.12	0.04	3.1	0	0	0	0.05	0.02
CO0854_3	COVID19-B	4.805	0.064	126	197	125	42	72	65	122	102	0.83	0.96	0.4	1.36	2.06	0.66	0	0	0	0.31	0	0.02	0.27	0.41	0.3	0.1	0.04	0.04	0.09	0.06	0	0.04	0.04	0	0	0	0.05	0.16	0	0.13	0.17	0.04	2.4	0	0	0.05	0.07	0
CO0854_4	COVID19-C	4.18	0.073	115	210	139	51	78	73	143	101	0.71	0.79	0.32	1.11	2.35	0.47	0	0	0	0.39	0	0.01	0.13	0.6	0.3	0.11	0.03	0.04	0.11	0.07	0	0.04	0	0	0	0	0.04	0.15	0	0.1	0.18	0.03	2.5	0	0	0	0.03	0
CO0860_1	COVID19-A	5.016	0.072	121	169	98	53	59	70	106	87	0.82	1.25	0.48	1.72	1.57	1.1	0	0	0	0.59	0.09	0	0.13	0.76	0.28	0.08	0.08	0.14	0.28	0.07	0	0.08	0.09	0	0.01	0.32	0.09	0.3	0.19	0.01	0.16	0.04	4	0	0	0.02	0	0
CO0860_3	COVID19-B	4.298	0.075	82	230	162	44	83	51	119	107	0.9	0.96	0.39	1.35	1.64	0.82	0	0	0	0.3	0	0	0.32	0.43	0.16	0.08	0.04	0.07	0.18	0.05	0	0	0	0	0	0	0.04	0.18	0	0.11	0.12	0.04	2.6	0	0	0	0.49	0
CO0860_4	COVID19-C	4.317	0.071	81	265	180	62	92	71	146	108	0.74	0.77	0.3	1.06	2.2	0.48	0	0	0	0.35	0	0	0.2	0.52	0.19	0.09	0.06	0.12	0.13	0.08	0	0.08	0	0.14	0	0	0.04	0.22	0	0.09	0.13	0.02	2.4	0	0	0	0.05	0
CO0862_1	COVID19-A	3.555	0.067	131	181	85	53	50	77	145	72	0.5	0.89	0.38	1.27	2	0.63	0.22	0	0	0.41	0	0.06	0.05	0.72	0.49	0.07	0.04	0.11	0.23	0.05	0	0.04	0	0	0.01	0	0.04	0.23	0	0.01	0.18	0.04	4.6	0	0	0	0	0
CO0862_3	COVID19-B	3.806	0.068	110	135	50	64	34	96	167	44	0.26	0.76	0.32	1.08	2.4	0.45	0	0	0.06	0.3	0	0.05	0	0.8	0.36	0.08	0.04	0.08	0.2	0.06	0	0	0.04	0	0.02	0.21	0.04	0.14	0	0.01	0.18	0	2	0	0	0	0.04	0
CO0862_4	COVID19-C	3.943	0.065	111	180	106	51	58	65	138	79	0.57	0.8	0.33	1.13	1.98	0.57	0	0	0.08	0.37	0	0.05	0.21	0.57	0.35	0.09	0.06	0.07	0.24	0.09	0	0	0	0.19	0	0	0.05	0.19	0	0.1	0.09	0.03	2	0	0	0	0	0
CO0863_1	COVID19-A	5.243	0.077	119	192	127	37	72	52	94	105	1.12	1.34	0.54	1.88	1.3	1.44	0	0	0	0.27	0	0.04	0.09	0.6	0.23	0.04	0.05	0.09	0.14	0	0	0.03	0.09	0	0	0.21	0.05	0.27	0	0.01	0.17	0.04	2.6	0	0	0	0.1	0.04
CO0863_3	COVID19-B	4.81	0.083	100	209	141	41	77	57	120	102	0.84	1	0.42	1.42	1.6	0.89	0	0	0	0.33	0	0.02	0.06	0.68	0.24	0.06	0.04	0.08	0.21	0.06	0	0.04	0.04	0	0.01	0.16	0.05	0.19	0	0.02	0.17	0	2.2	0	0	0	0.04	0.01
CO0863_4	COVID19-C	4.872	0.078	98	221	158	37	84	48	110	105	0.95	0.82	0.32	1.14	1.63	0.7	0	0	0.07	0.32	0	0.02	0.23	0.45	0.19	0.08	0.05	0.09	0.22	0.06	0	0.06	0.04	0.14	0	0	0.07	0.28	0	0.08	0.15	0.02	2.4	0	0	0	0.13	0
CO0867_1	COVID19-A	4.801	0.068	170	189	105	40	58	53	111	90	0.81	0.79	0.32	1.1	1.64	0.67	0	0	0	0.31	0	0.03	0.11	0.76	0.19	0.08	0.06	0.12	0.24	0.05	0	0.08	0.05	0	0.01	0.25	0.05	0.28	0	0.05	0.17	0.05	2.1	0	0	0	0.04	0
CO0867_3	COVID19-B	4.194	0.069	129	206	132	43	70	52	123	102	0.84	0.75	0.29	1.04	1.65	0.63	0	0	0.05	0.37	0.07	0.03	0.2	0.67	0.18	0.17	0.09	0.12	0.31	0.1	0	0.1	0.04	0.17	0.01	0	0.05	0.27	0	0.09	0.08	0.02	2.6	0	0	0	0.02	0
CO0867_4	COVID19-C	4.523	0.069	122	165	88	40	49	56	118	72	0.61	0.73	0.27	1	1.67	0.6	0	0	0	0.32	0	0.06	0.28	0.66	0.18	0.13	0.08	0.16	0.29	0.08	0	0	0.03	0.29	0.01	0	0.06	0.34	0	0.07	0.09	0.05	3.5	0	0	0	0	0
CO0870_1	COVID19-A	6.001	0.08	197	203	113	41	65	57	104	111	1.07	1.46	0.6	2.05	1.36	1.51	0.23	0	0	0.31	0	0.07	0.12	0.45	0.3	0.04	0.06	0.08	0.1	0	0	0.03	0.06	0	0.02	0.18	0.05	0.22	0	0	0.12	0.05	4.1	0	0	0.05	0.1	0.03
CO0870_3	COVID19-B	5.546	0.065	311	266	120	49	68	68	140	136	0.97	1.04	0.41	1.45	1.91	0.76	0	0	0	0.42	0	0.05	0	0.55	0.38	0.06	0.09	0.12	0.16	0	0	0.04	0.04	0	0.02	0	0.05	0.29	0	0	0.21	0.03	2.4	0	0	0	0.03	0
CO0870_4	COVID19-C	5.098	0.064	361	270	125	42	68	59	143	134	0.94	0.94	0.36	1.3	2.04	0.64	0	0	0	0.47	0	0.04	0.15	0.51	0.31	0.11	0.1	0.1	0.19	0.06	0	0.05	0	0	0.03	0	0.05	0.26	0	0.1	0.1	0.02	2.1	0	0	0	0	0
CO0873_1	COVID19-A	4.203	0.098	229	230	138	34	75	51	105	124	1.19	1.11	0.44	1.55	1.46	1.06	0	0	0	0.5	0.07	0.01	0.06	0.85	0.28	0.09	0.07	0.11	0.38	0	0	0.05	0.1	0	0.04	0.5	0.08	0.28	0	0.01	0.19	0.04	5	0	0	0	0.05	0.01
CO0873_3	COVID19-B	4.095	0.09	201	215	127	32	68	46	119	107	0.9	0.98	0.39	1.37	1.57	0.87	0	0	0	0.47	0	0.02	0.32	0.45	0.2	0.07	0.07	0.1	0.23	0	0	0.04	0.05	0.21	0.01	0.12	0.06	0.28	0	0.03	0.17	0.03	4.2	0	0	0	0.1	0
CO0873_4	COVID19-C	4.026	0.091	133	192	115	35	64	53	122	90	0.74	0.85	0.34	1.19	1.63	0.73	0	0	0	0.4	0	0	0.24	0.58	0.17	0.12	0.08	0.14	0.21	0.07	0	0.08	0.06	0	0	0	0.05	0.3	0	0.06	0.16	0.03	4	0	0	0	0.07	0
CO0875_1	COVID19-A	5.296	0.066	141	147	90	36	53	52	93	84	0.9	1.18	0.47	1.64	1.21	1.36	0	0	0	0.63	0	0	0.07	0.81	0.29	0.08	0.05	0.13	0	0.06	0	0.05	0.07	0	0.02	0.28	0.05	0.27	0.15	0.01	0.17	0.04	4.5	0	0	0	0.11	0
CO0875_3	COVID19-B	7.403	0.071	124	203	129	39	71	53	109	98	0.9	0.93	0.38	1.31	1.58	0.83	0	0	0.06	0.43	0	0	0.23	0.54	0.2	0.07	0.06	0.08	0.21	0.06	0	0	0.04	0	0.01	0.14	0.04	0.23	0	0.07	0.16	0.03	1.6	0	0	0	0.03	0
CO0875_4	COVID19-C	6.093	0.083	68	92	48	36	30	52	104	44	0.43	0.89	0.37	1.26	1.39	0.9	0	0.1	0.1	0.45	0	0	0.19	0.74	0.23	0.09	0.05	0.08	0.21	0.1	0	0	0.03	0.16	0	0	0.03	0.21	0	0.08	0.19	0	1.9	0	0	0	0.05	0
CO0882_1	COVID19-A	5.137	0.052	237	206	101	47	62	73	127	108	0.85	1.31	0.52	1.83	1.87	0.98	0	0	0.06	0.7	0.08	0.01	0.09	0.82	0.38	0.08	0.09	0.1	0	0	0	0.03	0.07	0	0.02	0.41	0.09	0.26	0	0	0.12	0.04	4.7	0	0	0	0	0
CO0882_3	COVID19-B	5.149	0.054	225	271	154	56	85	81	161	126	0.78	1.05	0.43	1.47	2.6	0.57	0	0	0	0.48	0	0.04	0.18	0.52	0.24	0.09	0.06	0.08	0	0.06	0	0	0	0.19	0	0	0.06	0.18	0	0.07	0.13	0.03	1.8	0	0	0	0.06	0
CO0882_4	COVID19-C	5.091	0.057	163	246	145	58	79	81	170	112	0.66	0.91	0.36	1.27	2.71	0.47	0	0	0.06	0.42	0	0.05	0.3	0.4	0.21	0.1	0.04	0.11	0	0.07	0	0.04	0.04	0	0	0	0.07	0.21	0	0.09	0.13	0.02	1.7	0	0	0	0.18	0
LM0035	Control	4.516	0.062	237	168	80	36	45	59	131	75	0.58	0.77	0.32	1.09	1.95	0.56	0	0	0	0.51	0	0	0.16	0.62	0.13	0.08	0.09	0.13	0.18	0.07	0	0	0.05	0.37	0	0	0.09	0.33	0	0.12	0.15	0.04	2.7	0.01	0	0	0	0
LM0038	Control	4.459	0.053	155	226	136	39	73	54	130	103	0.8	0.87	0.37	1.24	1.74	0.71	0	0	0	0.5	0	0.05	0.34	0.68	0.28	0.1	0.05	0.08	0.15	0	0	0.09	0	0	0	0	0.04	0.25	0	0.14	0.16	0.04	2.9	0.01	0	0	0	0
LM0074	Control	4.336	0.059	82	245	160	63	88	86	164	109	0.67	0.74	0.31	1.05	2.89	0.36	0	0	0	0.36	0	0	0.2	0.62	0.29	0.07	0	0.06	0.15	0.06	0	0	0	0	0	0	0.04	0.15	0	0.13	0.16	0.05	2.4	0	0	0	0.02	0
LM0076	Control	4.412	0.073	120	244	134	70	76	97	167	102	0.61	0.84	0.34	1.18	3.15	0.37	0	0	0.05	0.52	0	0.02	0.22	0.53	0.26	0.17	0.05	0.08	0.11	0.07	0	0	0.04	0	0	0	0.06	0.26	0	0.18	0.13	0.04	3.9	0	0	0	0.04	0
LM0084	Control	4.993	0.056	87	211	138	50	73	61	137	92	0.67	0.79	0.32	1.11	1.93	0.57	0	0	0	0.49	0	0.04	0.22	0.56	0.29	0.17	0.05	0.1	0.19	0.07	0	0	0.04	0	0	0	0.05	0.22	0	0.11	0.11	0.04	3.6	0	0	0	0	0
LM0087	Control	4.16	0.091	51	191	126	64	66	72	138	83	0.6	0.85	0.33	1.18	2.04	0.58	0	0	0	0.54	0.06	0.01	0.18	0.8	0.47	0.15	0.1	0.15	0.35	0.14	0	0	0.04	0	0	0	0.07	0.38	0	0.09	0.14	0.03	3.5	0	0	0	0.05	0
LM0093	Control	4.548	0.058	132	252	161	54	85	71	154	110	0.72	0.82	0.34	1.16	2.49	0.47	0	0	0	0.55	0	0.04	0.19	0.65	0.43	0.16	0.04	0.07	0.13	0.07	0	0	0	0.19	0	0	0.04	0.28	0	0.09	0.09	0.04	2.9	0	0	0	0	0
LM0099	Control	4.962	0.075	71	241	169	61	89	71	141	108	0.77	0.81	0.32	1.12	2.12	0.53	0	0	0.07	0.51	0	0.01	0.22	0.77	0.26	0.13	0.04	0.09	0.17	0.09	0	0	0.03	0.14	0	0	0.06	0.23	0	0.12	0.08	0.03	6.2	0	0	0	0	0
LM0100	Control	9.324	0.067	160	221	84	59	48	83	181	79	0.44	0.8	0.34	1.14	2.57	0.44	0	0	0	0.67	0	0	0.16	0.72	0.23	0.16	0.06	0.1	0.2	0.09	0	0	0.04	0.23	0.01	0	0.06	0.27	0	0.08	0.1	0.04	3.6	0	0	0	0	0
LM0103	Control	4.509	0.063	74	253	159	70	86	94	169	105	0.62	0.8	0.33	1.13	2.94	0.38	0	0	0	0.3	0	0.02	0.11	0.62	0.17	0.1	0.03	0.05	0.13	0.07	0	0	0.03	0	0	0	0.04	0.14	0	0.11	0.12	0.04	1.9	0	0	0	0.04	0
LM0114	Control	6.738	0.073	285	259	145	38	76	60	131	122	0.93	0.98	0.4	1.38	2.2	0.63	0	0	0	0.47	0	0.04	0.26	0.58	0.18	0.14	0.12	0.14	0.27	0.08	0	0	0.06	0	0.01	0	0.08	0.4	0	0.17	0.13	0.03	3.8	0	0	0	0.02	0
LM0130	Control	3.127	0.054	67	323	225	80	118	101	179	134	0.75	0.81	0.32	1.13	3.4	0.33	0	0	0	0.4	0	0.04	0.14	0.75	0.25	0.14	0.04	0.05	0.16	0.1	0	0.04	0	0.25	0	0	0.07	0.18	0	0.1	0.11	0.05	3.4	0	0	0	0.02	0
LM0134	Control	4.072	0.071	72	220	142	72	80	100	169	90	0.53	0.78	0.32	1.1	3.13	0.35	0	0	0.07	0.4	0	0	0.15	0.58	0.28	0.1	0.03	0.06	0.13	0.07	0	0	0	0	0	0	0.05	0.18	0	0.09	0.11	0.04	4.2	0	0	0	0	0
LM0143	Control	4.96	0.061	150	172	90	51	53	76	147	69	0.47	0.93	0.38	1.32	2.14	0.62	0	0	0.1	0.4	0	0.04	0.21	0.51	0.34	0.07	0.04	0.11	0.16	0.06	0	0.04	0.03	0.17	0	0.11	0.05	0.24	0	0.1	0.19	0.02	4	0.03	0	0.04	0.78	0
LM0145	Control	4.022	0.049	54	205	124	71	72	106	170	82	0.49	0.85	0.34	1.19	3.25	0.37	0	0	0	0.3	0	0.03	0.1	0.55	0.39	0.11	0.04	0.11	0	0.06	0	0	0	0	0	0	0.04	0.22	0	0.12	0.14	0.03	3.5	0.01	0	0	0.27	0
LM0146	Control	4.287	0.066	104	155	92	39	52	62	115	68	0.6	0.78	0.33	1.11	1.85	0.6	0	0	0.06	0.29	0	0	0.11	0.54	0.15	0.12	0.09	0.14	0.12	0.06	0	0.05	0.04	0	0	0	0.05	0.28	0	0.09	0.16	0.03	2.8	0	0	0	0.05	0
LM0171	Control	2.791	0.082	131	155	56	45	34	65	141	53	0.37	0.76	0.32	1.08	1.85	0.58	0	0	0	0.63	0	0	0.15	0.73	0.29	0.14	0.07	0.1	0.23	0.11	0	0	0.03	0.25	0	0	0.05	0.27	0	0.07	0.12	0.03	3.9	0	0	0	0	0
LM0172	Control	3.439	0.052	72	155	101	40	55	49	107	72	0.67	0.84	0.35	1.19	1.46	0.81	0	0	0	0.44	0	0.02	0.2	0.75	0.29	0.15	0.07	0.1	0.24	0.09	0	0	0.03	0	0	0	0.04	0.22	0	0.1	0.15	0.05	3.2	0	0	0	0.09	0
LM0200	Control	4.5	0.055	55	216	119	84	67	111	184	72	0.39	0.82	0.34	1.16	3.09	0.38	0	0	0	0.35	0	0.03	0.11	0.62	0.17	0.09	0.05	0.1	0	0.09	0	0	0.05	0.17	0	0	0.08	0.31	0	0.08	0.12	0.05	2.5	0	0	0	0.11	0
LM0204	Control	4.286	0.049	62	179	111	60	62	79	144	75	0.52	0.78	0.33	1.1	2.26	0.49	0	0	0	0.31	0	0	0.13	0.64	0.27	0.08	0.04	0.08	0.19	0.08	0	0	0.04	0.16	0	0	0.04	0.17	0	0.07	0.13	0.04	3.6	0	0	0	0.13	0
LM0216	Control	4.983	0.043	62	220	142	71	79	95	159	88	0.55	0.81	0.33	1.14	2.83	0.4	0	0	0	0.39	0	0.08	0.18	0.59	0.24	0.12	0.06	0.06	0.18	0.08	0	0	0.05	0	0	0	0.06	0.25	0	0.16	0.09	0.02	6.3	0	0	0	0	0
LM0222	Control	5.214	0.073	60	170	113	52	62	64	129	76	0.59	0.83	0.34	1.17	1.87	0.62	0	0	0.13	0.38	0	0.03	0.14	0.65	0.27	0.11	0.04	0.09	0.21	0.07	0	0	0	0	0	0	0.04	0.22	0	0.14	0.17	0.03	4.4	0	0	0	0.22	0
LM0234	Control	6.334	0.045	291	230	124	56	76	89	152	91	0.6	0.8	0.33	1.12	2.7	0.42	0	0	0	0.44	0	0.02	0.19	0.62	0.17	0.1	0.08	0.09	0.13	0.06	0	0	0.04	0.24	0	0	0.06	0.25	0	0.1	0.22	0.03	3	0	0	0	0	0
LM0251	Control	5.124	0.071	135	230	130	70	71	97	173	93	0.54	0.72	0.29	1.01	3.05	0.33	0	0	0.13	0.31	0	0.12	0.12	0.55	0.16	0.14	0.11	0.14	0.23	0.1	0	0	0.06	0	0.01	0	0.08	0.42	0	0.12	0.13	0.03	2.8	0	0	0	0.11	0
LM0282	Control	4.243	0.047	56	156	93	57	54	76	140	57	0.41	0.77	0.32	1.09	2.16	0.5	0	0	0	0.67	0	0	0.09	0.67	0.39	0.07	0.04	0.07	0.13	0.06	0	0.03	0	0.18	0	0.14	0.04	0.19	0	0.07	0.16	0.03	4	0	0	0	0	0
LM0306	Control	5.034	0.062	46	131	75	56	45	74	131	51	0.39	0.68	0.29	0.96	2.02	0.48	0	0	0.06	0.35	0	0	0.11	0.66	0.39	0.12	0.03	0.05	0.14	0.08	0	0.03	0	0.15	0	0	0.04	0.13	0	0.13	0.14	0.02	3.7	0	0	0	0.11	0
LM0320	Control	4.772	0.081	117	256	190	39	96	47	118	119	1.01	0.9	0.36	1.26	1.71	0.74	0	0	0.06	0.37	0	0.02	0.12	0.65	0.2	0.11	0.06	0.11	0.19	0.06	0	0	0.03	0	0	0.1	0.05	0.26	0	0.08	0.16	0	4.7	0.02	0	0	0.44	0
LM0338	Control	4.345	0.063	68	184	121	57	66	74	138	81	0.59	0.79	0.33	1.12	2.19	0.51	0	0	0	0.26	0	0.02	0.09	0.61	0.24	0.09	0.04	0.07	0.17	0.07	0	0	0.05	0.05	0	0	0	0.16	0	0.12	0.16	0.02	2	0	0	0	0.2	0
LM0397	Control	5.37	0.075	108	152	99	38	52	51	124	70	0.57	1.05	0.43	1.47	1.88	0.78	0	0	0.07	0.4	0	0.08	0.26	0.61	0.2	0.14	0.09	0.12	0.27	0.07	0	0	0.04	0.09	0	0	0.04	0.32	0	0.09	0.12	0.03	1.8	0	0	0	0.12	0
LM0414	Control	3.56	0.058	180	269	163	45	92	69	124	132	1.07	0.92	0.37	1.29	2.22	0.58	0	0	0	0.6	0	0.04	0.27	0.47	0.22	0.1	0.1	0.12	0.24	0.06	0	0.11	0.06	0.28	0	0.15	0.08	0.31	0	0.15	0.19	0.05	6	0.01	0	0	0.03	0
LM0431	Control	4.297	0.044	97	284	204	57	106	66	141	135	0.96	0.8	0.32	1.12	2.11	0.53	0	0	0.05	0.37	0	0.06	0.15	0.68	0.34	0.07	0.04	0.08	0.16	0.06	0	0	0	0.14	0	0.17	0.04	0.17	0	0.06	0.18	0.02	2.3	0	0	0	0.02	0
LM0433	Control	4.071	0.061	60	220	150	57	79	70	135	94	0.69	0.78	0.33	1.1	2.14	0.52	0	0	0	0.39	0	0	0.16	0.58	0.24	0.09	0.04	0.08	0.17	0.06	0	0	0	0.06	0	0	0.04	0.24	0	0.08	0.16	0.04	3.5	0	0	0	0.14	0
LM0438	Control	5.068	0.051	135	166	100	44	58	70	138	69	0.5	0.82	0.34	1.16	2.1	0.55	0	0	0	0.44	0	0.03	0.22	0.48	0.14	0.09	0.07	0.11	0.18	0.06	0	0	0.03	0.18	0	0	0.07	0.3	0	0.08	0.1	0.02	4	0	0	0	0	0
LM0448	Control	4.768	0.049	69	242	161	65	87	87	150	99	0.66	0.8	0.33	1.13	2.66	0.43	0	0	0	0.36	0	0.04	0.11	0.61	0.48	0.07	0.03	0.07	0.19	0	0	0	0.03	0	0	0.12	0.04	0.2	0	0.06	0.16	0.02	3.7	0	0	0	0.04	0
LM0449	Control	5.671	0.071	54	157	100	47	56	66	122	61	0.5	0.72	0.29	1.01	1.91	0.53	0	0	0.1	0.38	0	0	0.27	0.6	0.24	0.11	0.08	0.12	0.26	0.09	0	0.04	0.05	0.38	0	0	0.05	0.28	0	0.05	0.13	0	1.4	0	0	0	0.06	0
LM0476	Control	4.096	0.07	74	240	171	55	88	62	124	102	0.82	0.74	0.3	1.04	1.74	0.6	0	0	0	0.41	0	0	0.14	0.66	0.31	0.1	0.05	0.11	0.14	0.08	0	0.08	0.04	0	0	0	0.04	0.24	0	0.07	0.15	0.03	3.1	0	0	0	0.13	0
LM0503	Control	5.127	0.057	54	261	178	72	94	88	162	108	0.67	0.93	0.38	1.32	2.48	0.53	0	0	0	0.42	0	0.04	0.1	0.76	0.5	0.06	0.03	0.08	0.11	0	0	0.02	0.03	0	0	0.08	0.03	0.17	0	0.01	0.22	0.03	6.2	0	0	0	0.07	0
LM0512	Control	3.906	0.052	119	238	153	57	83	77	149	104	0.69	0.86	0.37	1.23	2.39	0.52	0	0	0	0.46	0	0.04	0.14	0.64	0.22	0.08	0.07	0.12	0.23	0.07	0	0.07	0.06	0.2	0	0.07	0.07	0.33	0	0.05	0.19	0.04	4.3	0	0	0	0	0
LM0656	Control	3.182	0.054	408	277	104	38	65	68	143	138	0.96	0.9	0.36	1.26	2.04	0.62	0	0	0	0.59	0	0.04	0.21	0.56	0.33	0.1	0.1	0.05	0.16	0.06	0	0.07	0	0.14	0.03	0	0.05	0.19	0	0.04	0.1	0	7.7	0	0	0	0	0
LM0659	Control	5.024	0.067	102	230	156	40	80	42	102	94	0.92	0.85	0.35	1.19	1.62	0.74	0	0	0	0.52	0	0	0.12	0.7	0.4	0.07	0.04	0.07	0.12	0.07	0	0.08	0.04	0	0.01	0.11	0.04	0.22	0	0.01	0.19	0.02	4.1	0	0	0	0.05	0
LM0079	Control	4.553	0.076	261	202	113	41	62	69	143	89	0.62	1.02	0.43	1.45	2.4	0.61	0	0	0	0.44	0	0	0.29	0.6	0.31	0.1	0.07	0.06	0.15	0.06	0	0	0	0.27	0	0	0.04	0.22	0	0.14	0.15	0.07	2.6	0	0	0	0.05	0
[truncated: 121 more columns]

## Sheet: B_Limma_lin_regr_Time-profile
	A.C	B.C	AveExpr	F	P.Value	adj.P.Val
GlycB	0.55083	0.10951	-4.08e-17	183.12	2.14e-31	1.63e-29
Glyc	0.54469	0.096575	-1.55e-19	182.5	2.41e-31	1.63e-29
GlycA	0.54332	0.090543	1.78e-18	181.5	2.9e-31	1.63e-29
Glyc/SPC	0.65192	0.09087	7.25e-18	168.05	3.96e-30	1.66e-28
Threonine	1.4412	0.35571	7.8e-17	71.414	7.27e-19	2.44e-17
Apo-A1	-0.33413	-0.0031845	-5.55e-16	67.743	2.9e-18	7.87e-17
TPA1	-0.33365	-0.0033538	4.48e-16	67.428	3.28e-18	7.87e-17
HDA1	-0.32696	-0.0066502	-3.75e-16	60.114	6.02e-17	1.26e-15
H3FC	-0.53804	-0.04505	-2.24e-17	59.724	7.07e-17	1.32e-15
H4A1	-0.37149	-0.011237	-1.48e-19	58.927	9.85e-17	1.65e-15
Pyruvic acid	1.1847	0.365	-1.2e-16	57.127	2.1e-16	3.2e-15
L6TG	0.58246	0.044548	1.18e-16	53.089	1.21e-15	1.69e-14
SPC	-0.32266	-0.027267	4.66e-18	52.678	1.45e-15	1.87e-14
HDFC	-0.37572	-0.039643	-4.88e-17	48.103	1.16e-14	1.4e-13
Histidine	-0.57864	-0.2327	-2.06e-16	46.383	2.62e-14	2.93e-13
Acetic acid	-1.2522	-0.47836	1.86e-17	44.65	6.02e-14	6.32e-13
Methionine	-0.84154	-0.45247	-1.12e-16	35.925	5.22e-12	5.16e-11
L1CH	-0.40247	0.047956	-7.47e-17	35.352	7.13e-12	6.65e-11
H4FC	-0.4626	-0.01269	-1.99e-17	35.086	8.23e-12	7.28e-11
HDTG	-0.44498	0.010363	-2.38e-16	33.699	1.77e-11	1.48e-10
H4TG	-0.39895	0.018991	3.87e-17	33.303	2.2e-11	1.76e-10
L6PL	0.46525	0.04208	1.52e-16	32.795	2.93e-11	2.24e-10
H1FC	-0.36198	-0.065047	5.69e-17	31.9	4.86e-11	3.55e-10
H4A2	-0.30447	-0.020029	-3.2e-16	31.686	5.49e-11	3.84e-10
TPA2	-0.25555	-0.0088832	-2.49e-16	29.377	2.09e-10	1.41e-09
L1FC	-0.34528	0.030376	4.23e-18	28.197	4.22e-10	2.73e-09
H1TG	-0.49337	0.0067227	4.99e-17	27.48	6.5e-10	4.03e-09
L6CH	0.44744	0.035055	2.35e-16	27.427	6.71e-10	4.03e-09
L6AB	0.46059	0.035825	-1.75e-16	27.109	8.14e-10	4.57e-09
L6PN	0.46061	0.035878	-2.61e-16	27.106	8.15e-10	4.57e-09
L1PL	-0.32116	0.045287	2.69e-16	26.345	1.3e-09	7.04e-09
L3FC	-0.39967	-0.028338	7.06e-17	25.725	1.91e-09	1e-08
L3PL	-0.39258	-0.021453	1.27e-16	22.985	1.08e-08	5.51e-08
L2PL	-0.3369	0.014955	-6.52e-17	22.865	1.17e-08	5.78e-08
Phenylalanine	0.66177	0.011978	-1.07e-16	22.423	1.56e-08	7.48e-08
H4CH	-0.27496	-0.0069139	-2.55e-16	20.503	5.56e-08	2.59e-07
H2TG	-0.3624	0.010067	4.56e-17	20.085	7.37e-08	3.35e-07
L2PN	-0.32505	0.0075674	7.13e-17	19.752	9.24e-08	3.98e-07
L2AB	-0.32511	0.0075907	-4.53e-17	19.752	9.24e-08	3.98e-07
L2FC	-0.37534	-0.016078	-2.19e-17	18.869	1.69e-07	7.11e-07
L3AB	-0.33575	-0.023087	-6.43e-17	17.961	3.18e-07	1.27e-06
L3PN	-0.33575	-0.023129	-2.01e-16	17.961	3.18e-07	1.27e-06
Glycerol	-0.65555	0.096372	3.61e-17	17.499	4.41e-07	1.72e-06
L2CH	-0.40029	0.010848	3.73e-17	17.272	5.18e-07	1.98e-06
H1A1	-0.27071	-0.037181	-2.22e-16	16.812	7.18e-07	2.68e-06
Chol	-0.19226	0.053448	-1.36e-16	16.447	9.33e-07	3.38e-06
TPCH	-0.19224	0.05323	1.6e-16	16.428	9.46e-07	3.38e-06
Acetoacetic acid	0.69349	0.15657	-2.26e-17	16.394	9.69e-07	3.39e-06
2-Oxoglutaric acid	0.59437	0.060262	-2.78e-16	16.051	1.24e-06	4.26e-06
V5TG	0.28659	0.10979	-6.63e-17	15.436	1.94e-06	6.53e-06
H3TG	-0.2958	0.018857	1.98e-17	15.218	2.28e-06	7.51e-06
HDA2	-0.18443	-0.0073377	1.61e-16	14.74	3.24e-06	1.05e-05
ABA1	0.24796	0.04352	-3.17e-17	14.417	4.12e-06	1.31e-05
Apo-B100/Apo-A1	0.24774	0.04389	-2.05e-17	14.376	4.25e-06	1.32e-05
LDFC	-0.2327	-0.0044237	-1.07e-16	14.152	5.02e-06	1.53e-05
L3CH	-0.4184	-0.066485	1.26e-16	14.1	5.22e-06	1.57e-05
L4FC	-0.38519	-0.025241	6.29e-17	13.991	5.67e-06	1.67e-05
Glutamine	0.30611	0.060847	8.74e-19	13.796	6.56e-06	1.9e-05
HDCH	-0.15541	0.010331	1.41e-16	13.535	8e-06	2.24e-05
HDCH.1	-0.15541	0.010331	1.41e-16	13.535	8e-06	2.24e-05
L5TG	0.36962	0.032131	-2e-17	13.431	8.65e-06	2.38e-05
HDL-Chol	-0.15343	0.010337	-8.17e-17	13.216	1.02e-05	2.76e-05
LDL-Chol	-0.21396	0.034564	-3.58e-16	12.99	1.21e-05	3.23e-05
LDCH	-0.21386	0.034141	-5.61e-16	12.904	1.29e-05	3.34e-05
LDCH.1	-0.21386	0.034141	-5.61e-16	12.904	1.29e-05	3.34e-05
L6FC	0.289	0.010141	-1.3e-16	12.199	2.22e-05	5.66e-05
H3A1	-0.15797	0.031187	1.04e-16	11.995	2.61e-05	6.54e-05
Tyrosine	0.1867	-0.10077	1.96e-16	11.71	3.26e-05	8.04e-05
L1AB	-0.21368	0.041527	2.98e-17	11.541	3.72e-05	8.96e-05
L1PN	-0.21355	0.041622	5.34e-17	11.535	3.73e-05	8.96e-05
V4TG	0.28428	0.16444	-1.25e-16	10.554	8.12e-05	0.00019224
H4PL	-0.16846	0.010832	2.89e-16	10.409	9.13e-05	0.000213
L4CH	-0.55188	-0.051556	-1.2e-16	10.308	9.9e-05	0.00022774
L4PL	-0.50728	-0.018822	9.93e-18	10.208	0.00010725	0.00024349
L4AB	-0.45654	-0.014107	-6.78e-17	9.1965	0.00024402	0.00054197
L4PN	-0.4567	-0.01401	-2.6e-17	9.1908	0.00024518	0.00054197
VLAB	0.24806	0.080348	9.96e-17	9.0007	0.00028665	0.00062064
VLPN	0.24798	0.080379	7.57e-17	8.9944	0.00028815	0.00062064
Glycine	0.24721	0.067099	-1.48e-16	8.6466	0.00038416	0.00081402
Glutamic acid	-0.48648	-0.26645	6.09e-17	8.6358	0.00038763	0.00081402
2-Hydroxybutyric acid	0.32262	-5.55e-16	7e-17	8.381	0.00047913	0.00099375
Valine	0.16281	-0.024264	-1.3e-16	8.2866	0.00051845	0.0010622
Proline	-0.62736	-0.21975	3.84e-17	8.1784	0.00056757	0.0011488
LDL-Phos	-0.14301	0.042995	2.13e-16	8.0262	0.00064482	0.0012896
LDPL	-0.1428	0.041605	1e-16	7.914	0.0007086	0.0014005
Leucine	0.18536	-0.042393	1.39e-16	7.6829	0.00086115	0.0016822
Citric acid	0.21975	0.19105	9.32e-17	7.3492	0.0011431	0.0022073
Glucose	0.14272	-0.061589	-7.82e-18	7.0759	0.0014435	0.0027558
LDTG	0.19223	0.038139	-8.72e-17	7.0524	0.0014729	0.0027802
H2FC	-0.2094	-0.063592	2.64e-17	6.7884	0.0018476	0.0034489
V5FC	0.49922	0.28558	-2.91e-17	5.9443	0.0038468	0.0071018
K-EDTA	0.11822	-0.095699	-1.65e-16	5.5913	0.0052473	0.0095821
Ethanol	0.44411	0.21435	-1.67e-16	5.3649	0.0064114	0.011582
Formic acid	0.19617	-0.14859	-1.61e-16	5.079	0.0082682	0.014777
Ornithine	0.31096	-0.12961	-1.14e-16	4.9026	0.0096809	0.016974
H3CH	-0.10353	0.032114	-7.19e-18	4.9004	0.0096992	0.016974
3-Hydroxybutyric acid	0.44237	0.10561	4.77e-17	4.5171	0.013692	0.023714
Isoleucine	0.15409	-0.03194	2.45e-16	4.4067	0.015129	0.025936
IDFC	-0.16528	0.062097	3.04e-17	4.1938	0.018354	0.031146
Creatine	-0.23996	-0.045658	-8.89e-17	4.1773	0.018632	0.031301
H2A1	-0.095171	0.0078167	7.31e-17	4.1021	0.019953	0.033189
Asparagine	0.27228	-0.0028143	-1.96e-16	4.07	0.020545	0.033839
V3FC	0.24031	0.10453	1.8e-17	4.0327	0.021256	0.034671
IDCH	-0.17118	0.030758	7.92e-17	4.0056	0.021788	0.035195
HDL-Phos	-0.086238	0.0073061	-1.05e-16	3.9331	0.02328	0.037248
HDPL	-0.085077	0.0092439	-1.73e-16	3.9073	0.023836	0.037777
H2CH	-0.090184	0.032101	-2.88e-17	3.7828	0.026717	0.041949
V4PL	0.16255	0.12881	7.17e-17	3.7396	0.027797	0.043241
V5CH	0.24062	0.19938	1.86e-18	3.6536	0.030085	0.04637
VLTG	0.16954	0.040327	-5.88e-17	3.4475	0.036383	0.055567
Sarcosine	0.2998	0.13394	1.7e-16	3.3015	0.041649	0.063036
Lactic acid	0.17641	0.1606	-1.12e-16	3.234	0.044339	0.066509
L3TG	0.13306	0.032926	-3.7e-17	3.1791	0.046662	0.069153
Lysine	-0.23683	-0.077214	2.54e-17	3.173	0.046925	0.069153
V3TG	0.17359	0.09713	8.21e-17	3.1318	0.048762	0.071234
IDPL	-0.099959	0.08733	2.88e-17	2.9636	0.057039	0.082609
H3A2	-0.079715	0.033981	1.23e-16	2.8324	0.064489	0.092599
Acetone	0.0899	-0.14599	-1.37e-16	2.7152	0.071987	0.10249
Succinic acid	0.19868	0.21307	-2.69e-16	2.5058	0.08768	0.12378
V3PL	0.14882	0.092576	5.21e-17	2.376	0.099124	0.13877
V2TG	0.13634	0.021586	1.09e-16	2.2024	0.11686	0.16225
2-Aminobutyric acid	-0.24149	-0.20008	-2.53e-17	2.0844	0.13075	0.18005
VLPL	0.12977	0.069118	-6.73e-17	2.0357	0.13697	0.18708
V4CH	0.097505	0.14937	-6.32e-17	2.0093	0.14045	0.19029
V2PL	0.1345	0.036488	5.33e-17	1.966	0.14639	0.19675
TPTG	0.121	0.045356	-3.78e-16	1.8698	0.1605	0.214
TG	0.12071	0.045832	-4.53e-16	1.8597	0.16206	0.21438
Creatinine	-0.070307	-0.040633	-2.96e-16	1.749	0.1802	0.23652
V1TG	0.12388	-0.0031267	9.07e-17	1.7003	0.18883	0.24592
LDHD	-0.070993	0.023351	-3.89e-17	1.6623	0.19586	0.25311
L4TG	0.11923	0.02351	-3.88e-18	1.6425	0.19962	0.25601
Dimethylsulfone	-0.13042	-0.073088	-3.38e-16	1.6054	0.2069	0.26333
V2FC	0.15282	0.060833	-1.24e-18	1.507	0.22748	0.28734
VLCH	0.10248	0.09603	-6.69e-17	1.266	0.28726	0.36014
VLFC	0.096126	0.083688	1.17e-16	1.2202	0.30035	0.37267
H1CH	-0.04172	0.025592	2.33e-17	1.2156	0.30168	0.37267
L5PN	0.091487	-0.0021531	4.11e-17	1.1395	0.32487	0.39654
L5AB	0.091384	-0.0021588	-1.93e-16	1.1368	0.32573	0.39654
V1PL	0.1057	0.011262	1.97e-17	1.0931	0.33988	0.41079
L2TG	-0.037186	0.045497	2.25e-17	1.0743	0.34616	0.41539
L1TG	0.098266	0.049195	1.18e-16	1.0106	0.36837	0.43567
Trimethylamine-N-oxide	-0.067908	-0.067908	-2.81e-16	0.9967	0.3734	0.43567
Choline	-0.067907	-0.067907	2.56e-16	0.9967	0.37341	0.43567
N,N-Dimethylglycine	0.067858	0	6.18e-16	0.99662	0.37343	0.43567
V1FC	-0.1423	0.0036315	2.42e-18	0.90704	0.40763	0.47176
V5PL	0.063569	0.12418	-1.33e-17	0.90115	0.40998	0.47176
V3CH	0.097415	0.10749	-2.21e-17	0.87553	0.4204	0.48046
V4FC	0.075846	0.1186	-8.77e-18	0.86244	0.42582	0.48337
H1PL	-0.050427	-0.0012491	-1.59e-16	0.85022	0.43096	0.48591
Apo-B100	-0.014449	0.04611	-6.46e-18	0.80928	0.44861	0.50244
TBPN	-0.014411	0.044371	-2.91e-16	0.76035	0.47069	0.52025
TPAB	-0.01442	0.044364	8.77e-18	0.76031	0.4707	0.52025
Ca-EDTA	-0.010191	0.024916	3.59e-17	0.67331	0.51274	0.56111
Alanine	0.062023	0.002536	5.77e-17	0.67013	0.51435	0.56111
V2CH	0.089442	0.02866	-4.38e-17	0.52934	0.59094	0.6405
H2A2	0.047268	0.041267	1.74e-17	0.47208	0.62534	0.66954
IDPN	-0.018131	0.043571	1.9e-16	0.46602	0.6291	0.66954
IDAB	-0.018047	0.043593	1.76e-17	0.46508	0.62969	0.66954
H3PL	0.043165	0.034438	-3.04e-16	0.4344	0.64909	0.68584
LDPN	0.0095043	0.040404	2.12e-16	0.3428	0.71076	0.74183
LDAB	0.0094952	0.040387	8.81e-20	0.34258	0.71092	0.74183
IDTG	0.053352	0.09256	-8.15e-18	0.33512	0.7162	0.74272
H1A2	0.01452	-0.026435	-4.95e-17	0.2542	0.77613	0.79994
H2PL	0.014668	0.026584	1.12e-16	0.16864	0.8451	0.86571
L5PL	0.032348	-0.0012258	2.99e-17	0.15678	0.85514	0.87069
V1CH	0.026877	0.014165	-1.19e-18	0.035825	0.96482	0.97645
L5FC	0.0073372	-0.0025071	-1e-18	0.012032	0.98804	0.99206
L5CH	0.0015828	-0.0073777	2.03e-16	0.0079744	0.99206	0.99206

## Sheet: C_Time-Course_HotellingT2
Name	Hotelling-T2
GlycB	261.363
Glyc	253.24
GlycA	246.666
Pyruvic acid	241.452
Glyc/SPC	216.001
Threonine	210.05
Acetic acid	112.066
Apo-A1	103.376
TPA1	102.485
L6TG	93.8428
HDA1	89.8643
H4A1	85.5791
Histidine	84.8447
Methionine	83.4646
H3FC	80.4338
L6PL	69.4505
Phenylalanine	68.9343
SPC	67.8629
L1CH	66.5971
HDFC	62.7269
L6CH	58.2481
L6AB	56.059
L6PN	56.0546
L1FC	54.855
L1PL	51.0237
L3CH	50.264
L2PL	49.7274
H1FC	49.3916
TPA2	46.8607
H4A2	46.8322
L3PL	44.3493
L2PN	44.2343
L2AB	44.2107
H4FC	44.0907
L3FC	41.1743
HDTG	39.4203
H4TG	39.2753
L3PN	33.7345
L3AB	33.7319
Glycine	33.559
Glycerol	32.7124
L2FC	32.2946
H3A1	31.8388
Glutamic acid	30.2326
Glutamine	30.1045
H1TG	30.0992
H4CH	29.7306
V5TG	29.5488
Chol	27.3827
TPCH	27.3175
Acetoacetic acid	27.0705
HDCH	26.0605
HDCH.1	26.0605
HDL-Chol	25.6452
H2TG	25.5377
ABA1	25.4223
Apo-B100/Apo-A1	25.3609
H1A1	24.5206
L2CH	24.1982
LDFC	24.1222
HDA2	23.8511
L6FC	23.5171
L5TG	23.2239
L1AB	23.0101
L1PN	23.001
2-Oxoglutaric acid	21.7844
LDL-Chol	21.7218
LDCH	21.6791
LDCH.1	21.6791
Tyrosine	21.1844
Proline	20.415
H3TG	20.0913
Citric acid	19.89
V4TG	19.5074
L4FC	18.8557
H4PL	18.8538
Ethanol	16.6642
Leucine	16.0241
L4CH	15.6837
VLAB	15.0735
VLPN	15.0606
LDL-Phos	13.5631
V5FC	13.4706
Valine	13.4664
LDPL	13.3328
H3CH	12.7555
Glucose	12.5873
L4PL	12.2683
Formic acid	11.8052
V4PL	10.9833
Ornithine	10.9266
L4AB	10.6004
L4PN	10.592
H2FC	9.09139
Isoleucine	9.03552
LDTG	8.97368
V5CH	8.96519
V4CH	8.88541
V3FC	8.80436
3-Hydroxybutyric acid	8.76913
2-Hydroxybutyric acid	8.60953
H2A1	8.50204
Lactic acid	8.34522
K-EDTA	8.12907
H2CH	8.08611
HDL-Phos	8.02474
HDPL	7.8709
IDPL	7.71869
Succinic acid	7.62725
Creatine	7.48198
IDCH	6.92901
Lysine	6.70656
Sarcosine	5.83043
V3PL	5.77742
V3TG	5.76909
Asparagine	5.62335
IDFC	5.42639
VLTG	5.40644
Creatinine	5.07242
H3A2	5.02423
L3TG	4.92942
Acetone	4.80972
V4FC	4.73588
VLPL	4.27352
2-Aminobutyric acid	4.16718
Dimethylsulfone	4.11914
V3CH	3.69139
VLCH	3.63642
V2FC	3.48327
VLFC	3.3905
V5PL	3.22992
V2TG	3.17993
LDHD	3.08638
V2PL	3.0849
TPTG	3.07675
TG	3.06941
L4TG	2.75187
V1TG	2.64568
L2TG	2.16747
H1CH	1.99641
Apo-B100	1.97922
IDTG	1.94113
TBPN	1.85248
TPAB	1.85214
L5PN	1.80339
L5AB	1.79811
V1PL	1.76213
L1TG	1.55734
Ca-EDTA	1.40896
H1PL	1.28285
V1FC	1.1587
Trimethylamine-N-oxide	1.04516
Choline	1.04516
N,N-Dimethylglycine	1.02037
V2CH	1.01432
H2A2	0.96286
Alanine	0.96164
LDPN	0.9483
LDAB	0.94761
IDPN	0.81383
IDAB	0.8122
H3PL	0.71793
H1A2	0.46709
H2PL	0.2936
L5PL	0.24728
V1CH	0.10933
L5FC	0.0197
L5CH	0.0166

## Sheet: D_Limma_lin_regr_Time+Phenotype
	logFC	AveExpr	t	P.Value	adj.P.Val	B
H2CH	0.90519	-2.8792e-17	5.3114	8.7185e-07	0.00013136	5.5406
H3FC	1.0436	-2.2424e-17	5.1684	1.5638e-06	0.00013136	4.9977
H2A2	0.92481	1.7375e-17	4.723	9.1842e-06	0.00041601	3.3567
H3A2	0.85273	1.2251e-16	4.7035	9.905e-06	0.00041601	3.2868
Choline	-0.92806	2.5589e-16	-4.5202	2.0017e-05	0.00067259	2.6369
H2PL	0.72476	1.1154e-16	4.2754	5.0046e-05	0.0014013	1.793
H3CH	0.67847	-7.1857e-18	4.0528	0.00011229	0.002695	1.0515
Succinic acid	-1.52	-2.6898e-16	-3.8648	0.00021783	0.0041345	0.44587
Acetone	-1.4581	-1.3675e-16	-3.86	0.00022149	0.0041345	0.43068
H3A1	0.53008	1.039e-16	3.4626	0.00084318	0.014165	-0.78231
Glucose	-0.70446	-7.8221e-18	-3.42	0.00096764	0.014779	-0.90644
H2FC	0.72765	2.6423e-17	3.3778	0.0011082	0.015515	-1.0285
L4FC	0.9387	6.2871e-17	3.1168	0.0025007	0.032316	-1.7573
SPC	0.3975	4.6647e-18	3.0839	0.0027624	0.033149	-1.8459
HDL-Chol	0.40276	-8.1744e-17	3.0536	0.0030258	0.033889	-1.9269
HDCH	0.39582	1.4143e-16	2.9997	0.0035531	0.035113	-2.0694
HDCH.1	0.39582	1.4143e-16	2.9997	0.0035531	0.035113	-2.0694
HDPL	0.40489	-1.7272e-16	2.9443	0.0041825	0.036154	-2.2138
TPA2	0.40999	-2.491e-16	2.9304	0.0043563	0.036154	-2.2497
HDL-Phos	0.40084	-1.0476e-16	2.9226	0.0044564	0.036154	-2.2698
Valine	-0.5362	-1.2996e-16	-2.9022	0.0047285	0.036154	-2.3221
Acetoacetic acid	-1.3627	-2.2566e-17	-2.9017	0.0047344	0.036154	-2.3232
H3PL	0.51872	-3.0367e-16	2.8652	0.0052606	0.038425	-2.416
H1A2	0.60461	-4.9468e-17	2.808	0.0061944	0.043361	-2.5597
V4TG	0.62801	-1.2505e-16	2.7343	0.0076199	0.048591	-2.741
L4PN	1.2207	-2.5986e-17	2.7255	0.0078079	0.048591	-2.7623
L4AB	1.2198	-6.7802e-17	2.7254	0.0078093	0.048591	-2.7625
L4PL	1.25	9.9306e-18	2.656	0.0094547	0.056728	-2.9291
H2TG	0.6442	4.5558e-17	2.6023	0.010938	0.063366	-3.0556
HDA2	0.36819	1.6102e-16	2.5892	0.011332	0.063456	-3.0862
H1PL	0.41653	-1.59e-16	2.5543	0.012439	0.067413	-3.1669
GlycA	0.27314	1.7841e-18	2.418	0.017764	0.093259	-3.4731
Isoleucine	-0.58906	2.4529e-16	-2.3777	0.019683	0.1002	-3.5606
Glyc	0.26582	-1.5161e-19	2.3633	0.020418	0.10089	-3.5919
H2A1	0.33931	7.3098e-17	2.2925	0.024368	0.11697	-3.7419
H1FC	0.39998	5.6893e-17	2.2392	0.027778	0.12183	-3.8524
H1CH	0.35718	2.325e-17	2.217	0.029319	0.12183	-3.8978
Apo-A1	0.27013	-5.5507e-16	2.2149	0.029464	0.12183	-3.902
V4CH	0.61904	-6.3226e-17	2.2132	0.029591	0.12183	-3.9056
HDFC	0.34436	-4.8787e-17	2.213	0.029602	0.12183	-3.9059
Leucine	-0.50492	1.3889e-16	-2.2101	0.029811	0.12183	-3.9118
TPA1	0.26757	4.4832e-16	2.1925	0.031099	0.12183	-3.9472
HDA1	0.27561	-3.7521e-16	2.1872	0.031503	0.12183	-3.9581
GlycB	0.2458	-4.0844e-17	2.1818	0.031908	0.12183	-3.9687
V3TG	0.55393	8.2105e-17	2.1552	0.033998	0.12692	-4.0218
H3TG	0.50516	1.9801e-17	2.1359	0.03559	0.12998	-4.0599
HDTG	0.49678	-2.3771e-16	2.1219	0.036782	0.13148	-4.0873
L4CH	1.0213	-1.1957e-16	2.0575	0.042734	0.14695	-4.2116
3-Hydroxybutyric acid	-1.157	4.7747e-17	-2.0359	0.044904	0.14695	-4.2524
Chol	0.33904	-1.356e-16	2.0352	0.044973	0.14695	-4.2537
TPCH	0.33868	1.5996e-16	2.0333	0.045167	0.14695	-4.2572
V4PL	0.47086	7.1677e-17	2.0303	0.045484	0.14695	-4.263
H4FC	0.46597	-1.9942e-17	2.0036	0.048328	0.15319	-4.3128
H1A1	0.36965	-2.2188e-16	1.9756	0.051477	0.16015	-4.3645
V1FC	-0.8424	2.4187e-18	-1.8439	0.068719	0.20991	-4.5985
L3FC	0.41931	7.0567e-17	1.824	0.071696	0.21509	-4.6325
2-Oxoglutaric acid	0.76909	-2.7801e-16	1.8015	0.075201	0.22165	-4.6707
H1TG	0.50618	4.9863e-17	1.7696	0.080409	0.23291	-4.7239
K-EDTA	-0.39979	-1.6457e-16	-1.6874	0.095225	0.26705	-4.8572
L1CH	0.36687	-7.4692e-17	1.6866	0.095375	0.26705	-4.8584
Lysine	-0.5834	2.5358e-17	-1.6458	0.10354	0.28186	-4.9224
Ornithine	0.877	-1.1418e-16	1.6404	0.10465	0.28186	-4.9307
V5TG	0.31467	-6.6258e-17	1.6354	0.1057	0.28186	-4.9384
V3PL	0.38465	5.2068e-17	1.5092	0.135	0.35438	-5.1257
V3CH	0.49625	-2.2139e-17	1.4961	0.13838	0.35765	-5.1444
V4FC	0.49502	-8.7723e-18	1.464	0.14692	0.37399	-5.1893
Glycerol	0.742	3.6105e-17	1.451	0.15048	0.37733	-5.2072
Ethanol	0.72309	-1.6744e-16	1.4424	0.15291	0.37777	-5.2191
L1PL	0.28388	2.6939e-16	1.395	0.16668	0.40384	-5.2828
Acetic acid	-0.68708	1.8617e-17	-1.3897	0.16827	0.40384	-5.2898
L3PL	0.3296	1.2663e-16	1.3693	0.17454	0.41299	-5.3166
IDFC	0.40583	3.0354e-17	1.3526	0.17981	0.41955	-5.3382
V5PL	0.45674	-1.33e-17	1.3356	0.18528	0.4214	-5.36
IDCH	0.37931	7.9177e-17	1.3346	0.18562	0.4214	-5.3613
Alanine	0.28708	5.7655e-17	1.2806	0.20384	0.4566	-5.4284
H4CH	-0.22305	-2.5466e-16	-1.2321	0.22133	0.48242	-5.4866
Glutamic acid	0.53059	6.0856e-17	1.2242	0.22427	0.48242	-5.4958
LDPL	0.21682	1.0015e-16	1.2063	0.23109	0.48242	-5.5166
V5CH	0.42079	1.8581e-18	1.1955	0.23524	0.48242	-5.529
LDL-Phos	0.2141	2.1346e-16	1.1914	0.23683	0.48242	-5.5336
IDPL	0.33449	2.8843e-17	1.1753	0.24319	0.48242	-5.5519
V3FC	0.36803	1.7978e-17	1.1732	0.24403	0.48242	-5.5543
L3AB	0.27031	-6.4319e-17	1.1684	0.24593	0.48242	-5.5596
L3PN	0.27019	-2.0094e-16	1.168	0.24612	0.48242	-5.5601
L1AB	0.24576	2.9816e-17	1.1662	0.24684	0.48242	-5.5621
L1PN	0.24564	5.3399e-17	1.1656	0.24706	0.48242	-5.5627
LDCH	0.22408	-5.6148e-16	1.1454	0.25528	0.48242	-5.5851
LDCH.1	0.22408	-5.6148e-16	1.1454	0.25528	0.48242	-5.5851
LDL-Chol	0.22354	-3.5832e-16	1.1447	0.25557	0.48242	-5.5858
L3CH	0.34785	1.2632e-16	1.1112	0.26966	0.49502	-5.6221
H4A2	-0.17537	-3.204e-16	-1.1087	0.2707	0.49502	-5.6247
2-Aminobutyric acid	-0.51699	-2.5273e-17	-1.1055	0.27209	0.49502	-5.6281
H4A1	-0.15845	-1.4809e-19	-1.101	0.27403	0.49502	-5.6328
V1PL	-0.3125	1.9695e-17	-1.0766	0.28475	0.50892	-5.6583
LDFC	0.18595	-1.0705e-16	1.0054	0.31759	0.56164	-5.7294
V1TG	-0.2866	9.0727e-17	-0.98672	0.32661	0.56728	-5.7473
Glyc/SPC	-0.14024	7.2492e-18	-0.98481	0.32754	0.56728	-5.7491
L1FC	0.20091	4.2346e-18	0.97792	0.33092	0.56728	-5.7556
VLFC	0.23227	1.1735e-16	0.93868	0.35058	0.59269	-5.7918
L4TG	0.24072	-3.882e-18	0.93435	0.35279	0.59269	-5.7957
VLCH	0.2419	-6.6907e-17	0.90703	0.36698	0.61042	-5.8199
V5FC	0.46198	-2.9053e-17	0.86013	0.39216	0.64591	-5.8598
Sarcosine	-0.36146	1.6969e-16	-0.83646	0.40526	0.65844	-5.8791
V2CH	0.27315	-4.3805e-17	0.83228	0.40761	0.65844	-5.8825
IDPN	0.19688	1.8961e-16	0.81062	0.41987	0.66035	-5.8997
Proline	-0.47135	3.8361e-17	-0.80992	0.42027	0.66035	-5.9002
IDAB	0.19663	1.7601e-17	0.80937	0.42058	0.66035	-5.9006
L2TG	0.15859	2.2544e-17	0.75927	0.44981	0.69022	-5.9386
Glutamine	-0.17145	8.7441e-19	-0.75167	0.45435	0.69022	-5.9441
L6FC	-0.18335	-1.2953e-16	-0.74686	0.45723	0.69022	-5.9476
V2TG	0.18773	1.0944e-16	0.72715	0.46915	0.69022	-5.9616
L6AB	-0.18353	-1.7494e-16	-0.71341	0.47756	0.69022	-5.9712
L6PN	-0.18333	-2.61e-16	-0.71256	0.47809	0.69022	-5.9718
VLPL	0.16485	-6.7288e-17	0.69286	0.49031	0.69022	-5.9852
Citric acid	-0.15884	9.3196e-17	-0.68952	0.49239	0.69022	-5.9874
Creatinine	0.095497	-2.9621e-16	0.68442	0.49559	0.69022	-5.9908
H4PL	-0.11147	2.8885e-16	-0.68423	0.49571	0.69022	-5.9909
TBPN	0.12531	-2.9086e-16	0.6822	0.49699	0.69022	-5.9922
TPAB	0.12531	8.7723e-18	0.68217	0.497	0.69022	-5.9923
VLAB	0.14982	9.9606e-17	0.67928	0.49882	0.69022	-5.9942
VLPN	0.14975	7.5739e-17	0.67898	0.49901	0.69022	-5.9944
Apo-B100	0.1239	-6.4594e-18	0.67403	0.50213	0.69022	-5.9976
V2FC	0.2192	-1.2411e-18	0.66898	0.50534	0.69022	-6.0009
Threonine	0.30125	7.802e-17	0.64857	0.51838	0.70232	-6.0139
L6CH	-0.15683	2.354e-16	-0.63136	0.52951	0.71167	-6.0245
LDAB	0.11452	8.8147e-20	0.60715	0.54539	0.72154	-6.0391
LDPN	0.11451	2.1178e-16	0.60705	0.54545	0.72154	-6.0391
LDHD	-0.1158	-3.894e-17	-0.58118	0.56267	0.73851	-6.054
Creatine	-0.18594	-8.8908e-17	-0.57044	0.5699	0.74219	-6.06
L6TG	-0.12707	1.1788e-16	-0.54628	0.58631	0.7577	-6.073
L5FC	0.13037	-1.0013e-18	0.53469	0.59427	0.75914	-6.0791
L6PL	-0.12362	1.5162e-16	-0.52622	0.60012	0.75914	-6.0835
Apo-B100/Apo-A1	-0.094585	-2.0535e-17	-0.5189	0.60519	0.75914	-6.0872
ABA1	-0.094513	-3.1705e-17	-0.51845	0.60551	0.75914	-6.0874
V1CH	-0.18358	-1.1917e-18	-0.49433	0.62236	0.77449	-6.0992
V2PL	0.12549	5.3339e-17	0.48387	0.62973	0.77478	-6.1042
Glycine	-0.10931	-1.4792e-16	-0.48093	0.63181	0.77478	-6.1056
H4TG	0.10004	3.8689e-17	0.46787	0.64108	0.78045	-6.1116
L3TG	0.083564	-3.7004e-17	0.41122	0.68195	0.82423	-6.1357
Histidine	0.090188	-2.0619e-16	0.4035	0.6876	0.82512	-6.1388
IDTG	0.15397	-8.1518e-18	0.36695	0.71458	0.8472	-6.1525
Lactic acid	0.10355	-1.1209e-16	0.36493	0.71608	0.8472	-6.1532
Formic acid	-0.1283	-1.609e-16	-0.31982	0.7499	0.881	-6.1682
TG	0.072723	-4.5305e-16	0.31129	0.75635	0.8824	-6.1708
Pyruvic acid	0.12566	-1.2044e-16	0.29943	0.76535	0.88305	-6.1743
TPTG	0.069349	-3.783e-16	0.29672	0.76741	0.88305	-6.1751
Tyrosine	0.049339	1.9609e-16	0.22141	0.82531	0.94191	-6.1941
L1TG	-0.055103	1.1838e-16	-0.21565	0.82978	0.94191	-6.1953
Phenylalanine	0.067533	-1.0685e-16	0.16154	0.87206	0.98015	-6.2052
VLTG	0.039309	-5.8825e-17	0.15762	0.87513	0.98015	-6.2058
L2PL	0.024572	-6.5221e-17	0.11295	0.91034	0.99981	-6.2117
L5CH	-0.029915	2.0265e-16	-0.10685	0.91517	0.99981	-6.2123
LDTG	0.020284	-8.717e-17	0.10124	0.9196	0.99981	-6.2129
Methionine	-0.036101	-1.1192e-16	-0.098269	0.92195	0.99981	-6.2132
L5PL	-0.024548	2.9885e-17	-0.097643	0.92245	0.99981	-6.2132
L2PN	-0.015631	7.1307e-17	-0.069975	0.94438	1	-6.2155
L2AB	-0.015604	-4.5307e-17	-0.06984	0.94449	1	-6.2155
L5AB	-0.014137	-1.926e-16	-0.053993	0.95707	1	-6.2165
L5PN	-0.01412	4.1127e-17	-0.053934	0.95712	1	-6.2165
L2CH	-0.0056037	3.7339e-17	-0.019012	0.98488	1	-6.2177
L5TG	-0.0026009	-1.997e-17	-0.0089044	0.99292	1	-6.2178
L2FC	-0.00109	-2.1864e-17	-0.0042677	0.9966	1	-6.2179
Dimethylsulfone	1.7764e-15	-3.3781e-16	6.5859e-15	1	1	-6.2179
2-Hydroxybutyric acid	8.8818e-16	6.9953e-17	2.6404e-15	1	1	-6.2179
Asparagine	9.3849e-16	-1.9587e-16	2.2917e-15	1	1	-6.2179
N,N-Dimethylglycine	3.4001e-16	6.179e-16	1.6572e-15	1	1	-6.2179
Ca-EDTA	-1.4572e-16	3.5936e-17	-1.2663e-15	1	1	-6.2179
Trimethylamine-N-oxide	-1.3878e-16	-2.8071e-16	-6.7593e-16	1	1	-6.2179
